# Supplementary material for: Publication of data collection forms from NHLBI funded sickle cell disease implementation consortium (SCDIC) registry
Source: PubMed Central journal article supplement (PMC7341606; doi:10.1186/s13023-020-01457-x), 2020-07-07
Supplement: 13023_2020_1457_MOESM2_ESM.pdf [file 13023_2020_1457_MOESM2_ESM.pdf]

# Publication of data collection forms from NHLBI funded Sickle Cell Disease Implementation Consortium (SCDIC) Registry: Supplemental Appendices

---

Jeffrey A Glassberg <sup>1</sup>, Elizabeth A Linton <sup>1</sup>, Katrina Burson <sup>2</sup>, Tabitha Hendershot <sup>2</sup>, Joseph Telfair <sup>3</sup>, Julie Kanter <sup>4</sup>, Victor R Gordeuk <sup>5</sup>, Allison A King <sup>6</sup>, Cathy L Melvin <sup>7</sup>, Nirmish Shah <sup>8</sup>, Jane S Hankins <sup>9</sup>, Lynne D Richardson<sup>1</sup>, for the Sickle Cell Disease Implementation Consortium

<sup>1</sup>Department of Emergency Medicine, Icahn School of Medicine at Mount Sinai, New York, NY; <sup>2</sup>RTI International, Research Triangle Park, NC; <sup>3</sup>Jiann-Ping Hsu College of Public Health, Georgia Southern University, Statesboro, GA; <sup>4</sup>Division of Hematology & Oncology, University of Alabama at Birmingham School of Medicine, Birmingham, AL; <sup>5</sup>Division of Pediatric Hematology-Oncology, University of Illinois at Chicago, Chicago, IL; <sup>6</sup>Washington University School of Medicine in St. Louis, St. Louis, MO; <sup>7</sup>Department of Public Health Sciences, Medical University of South Carolina, Charleston, SC; <sup>8</sup>Division of Hematology, Duke University School of Medicine, Durham, NC; <sup>9</sup>Department of Hematology, St. Jude Children's Research Hospital, Memphis, TN

|                                                                                                |   |
|------------------------------------------------------------------------------------------------|---|
| Supplemental appendix 1: Definitions of conditions on the Medical Record Abstraction Form..... | 2 |
| Supplemental appendix 2: Members of the Sickle Cell Disease Implementation Consortium .....    | 4 |
| Supplemental appendix 3: SCDIC Registry data collection forms (REDCap data dictionary) .....   | 5 |
| Supplemental appendix 4: SCDIC Registry data collection forms (Paper).....                     | 6 |

Researchers publishing data collected using SCDIC forms are asked to acknowledge the Consortium as follows: "Data collection instruments were (used/modified) from those developed under the Sickle Cell Disease Implementation Consortium supported by cooperative agreements from the National Heart, Lung, and Blood Institute and the National Institute on Minority Health and Health Disparities (Bethesda, MD)."

Supplemental appendix 1: Definitions of conditions on the Medical Record Abstraction Form

| Item                                         | Definition                                                                                                                                                                                                                                                                                                      |
|----------------------------------------------|-----------------------------------------------------------------------------------------------------------------------------------------------------------------------------------------------------------------------------------------------------------------------------------------------------------------|
| Steady state                                 | Steady state is 2 weeks before or after blood transfusions, pain crisis, priapism, stroke, or acute event.                                                                                                                                                                                                      |
| <b>SCD complications section</b>             |                                                                                                                                                                                                                                                                                                                 |
| 32. Avascular necrosis                       | 1) documented on MRI, or 2) Any mention in medical record is acceptable.                                                                                                                                                                                                                                        |
| 33. Dactylitis                               | Any mention in medical record is acceptable.                                                                                                                                                                                                                                                                    |
| 34. Osteomyelitis                            | Any mention in medical record is acceptable.                                                                                                                                                                                                                                                                    |
| 35. Chronic kidney disease                   | 1) physician documentation of chronic or abnormal creatinine (>0.8 for Hb SS or Hb Sβ0>1.2 for Hb SC) on at least two consecutive tests or 2) abnormal creatinine (>0.8 for Hb SS or Hb Sβ0>1.2 for Hb SC) confirmed at steady state present for at least 3 months (per National Kidney Foundation guidelines). |
| 36. End stage renal disease                  | 1) Having a steady state GFR <15 mL/min/1.73 m <sup>2</sup> 2) receiving dialysis for at least 3 months, or 3) having undergone kidney transplant.                                                                                                                                                              |
| 37. Priapism                                 | Any mention in medical record is acceptable.                                                                                                                                                                                                                                                                    |
| 38. Stroke                                   | 1) documented on MRI, or 2) Any mention in medical record is acceptable.                                                                                                                                                                                                                                        |
| 38d. Silent stroke                           | Any non-specific bright hypertensive spot on T2 flares requires investigator to adjudicate.                                                                                                                                                                                                                     |
| 39. Intracranial bleeding                    | Any mention in medical record is acceptable.                                                                                                                                                                                                                                                                    |
| 40. Pulmonary arterial hypertension          | Any mention of pulmonary hypertension in medical record. An ECHO may be used to confirm the diagnosis but only if it was taken while the person was in steady state.                                                                                                                                            |
| 41. Left ventricular dysfunction             | Any mention in medical record is acceptable.                                                                                                                                                                                                                                                                    |
| 42. Acute chest syndrome                     | Any mention in medical record is acceptable.                                                                                                                                                                                                                                                                    |
| 43. Asthma                                   | Any mention in medical record is acceptable.                                                                                                                                                                                                                                                                    |
| 44. Gallstones/cholelithiasis, cholecystitis | Any mention in medical record is acceptable.                                                                                                                                                                                                                                                                    |
| 45. Splenomegaly                             | Any mention in medical record is acceptable.                                                                                                                                                                                                                                                                    |
| 45c. Hypersplenism                           | Any mention in medical record is acceptable.                                                                                                                                                                                                                                                                    |
| 46. Deep vein thrombosis (DVT)               | Any mention in medical record is acceptable.                                                                                                                                                                                                                                                                    |
| 47. Lupus                                    | Any mention in medical record is acceptable                                                                                                                                                                                                                                                                     |
| 48. Rheumatoid arthritis                     | Any mention in medical record is acceptable.                                                                                                                                                                                                                                                                    |
| 49. Gout                                     | Any mention in medical record is acceptable.                                                                                                                                                                                                                                                                    |
| 50. Sarcoidosis                              | Any mention in medical record is acceptable.                                                                                                                                                                                                                                                                    |
| 51. Other autoimmune or Inflammatory         | Any mention in medical record is acceptable.                                                                                                                                                                                                                                                                    |
| 52. Multi-organ failure                      | Any mention in the medical record is acceptable. Could also be called multi-organ syndrome.                                                                                                                                                                                                                     |
| 52e. Hemodialysis                            | 'Hemodialysis' may not be stated in the medical record; another acceptable term is Continual Renal Replacement Therapy (CRRT).                                                                                                                                                                                  |
| 53. Pneumococcal sepsis                      | Any mention in medical record is acceptable.                                                                                                                                                                                                                                                                    |
| 54. Skin ulcers                              | Any mention in medical record is acceptable.                                                                                                                                                                                                                                                                    |

| Item                           | Definition                                                                                                            |
|--------------------------------|-----------------------------------------------------------------------------------------------------------------------|
| 55. Retinopathy                | Any mention in medical record is acceptable.                                                                          |
| 56. Iron overload              | Any mention in medical record is acceptable.                                                                          |
| 57. Chronic refractory pain    | 1) Received $\geq 70$ -day opioid supply in 90-day period, and/or 2) any mention in the medical record is acceptable. |
| 58. Anxiety                    | Any mention in medical record is acceptable.                                                                          |
| 59. Depression                 | Any mention in medical record is acceptable.                                                                          |
| 60. Other psychiatric disorder | Any mention in medical record is acceptable.                                                                          |
| 61. Cancer                     | Any mention in medical record is acceptable.                                                                          |

## Supplemental appendix 2: Members of the Sickle Cell Disease Implementation Consortium

### ST. JUDE

Jane Hankins, MD, MS  
Jason Hodges, PhD, MA  
Yvonne Carroll, RN, JD  
Lisa Klesges, PhD  
Hamda Khan, MA  
Matthew Smeltzer, PhD, MS  
Chinonyelum Nwosu, MPH  
James Gurney, PhD  
Jerlym Potter, PhD, MPH  
Nicole Alberts, PhD  
Jeffrey Frey, BS, MS, MBA, PhD  
Michael Jackson  
Sherif Badawy, MBBCh, MS  
Michael DeBaun, MD, MPH  
Ramin Homayouni, PhD  
Tamanna Shamrin, PhD  
Guolian Kang, PhD  
Jeremie Estépp, MD

### UCSF

Marsha Treadwell, PhD  
Elliott Vichinsky, MD  
Ted Wun, MD  
Michael Potter, MD  
Danielle Hessler, PhD  
Ward Hagar, MD  
Anne Marsh, MD  
Lynne Neumayr, MD

### MUSC

Cathy Melvin, PhD  
Shannon Phillips, PhD, RN  
Robert Adams, MD  
Martina Mueller, PhD

### DUKE

Nirmish Shah, MD  
Paula Tanabe, PhD, MSN  
Hayden Bosworth, PhD

George Jackson, PhD  
Fred Johnson, MBA  
Rachel Richesson, PhD  
Janet Prvu-Bettger, ScD

### LURIE CHILDRENS

Alexis Thompson, MD

### WASH U

Allison King, MD, PhD  
Ana Baumann, PhD  
Cecelia Calhoun, MD MPH  
Aimee James, PhD, MPH  
Regina A. Abel, PhD

### AUGUSTA

Abdullah Kutlar, MD  
Robert Gibson, PhD  
Angie Snyder, PhD  
Maria Fernandez, PhD  
Matthew Lyon, MD  
Richard Lottenberg, MD  
Betty Pace, MD  
E. Leila Jerome Clay, MD  
Raymona Lawrence, DrPH

### MOUNT SINAI

Lynne D. Richardson, MD  
Jeffrey Glassberg MD, MA  
Jena Simon, MS, APRN-BC  
Nicholas G. Genes, MD, PhD  
George T. Loo, DrPH  
Jason S. Shapiro, MD, MA  
Kimberly Souffront PhD, FNP-BC,  
RN  
Cindy Clesca, MA  
Elizabeth Linton, MPH  
Gery Ryan PhD, MA

### RTI INTERNATIONAL

Barbara L Kroner, PhD  
Lucia Rojas-Smith, DrPH  
Tabitha Hendershot, BA  
Lisa DiMartino, PhD, MPH  
Sara Jacobs, PhD  
Whitney Battestilli, BA  
Liliana Preiss, MS  
Norma Pugh, MS

### NHLBI

Sharon M Smith, PhD  
Harvey Luksenberg, MD  
Marlene Peters-Lawrence, BSN,  
RN  
Cheryl Boyce, PhD  
Whitney Barfield, PhD  
Ellen Werner, PhD

### CHICAGO

Victor Gordeuk, MD  
Melissa Gutierrez, MS  
Jana Hirschtick, PhD  
Lewis Hsu, MD, PhD  
Jerry Krishnan, MD, PhD  
Nadew Sebro, MD  
Abe Wandersman, PhD  
Michael Berbaum, PhD  
Kishore Bobba, MD  
Joe Colla, MD  
Kim Erwin, MDes  
Andrea Lamont, PhD  
Molly Martin, MD, MAPP  
Sarah Norell, MDes, MFA  
Ananta Pandit, MD  
Kay Saving, MD  
Robin Shannon, DNP, RN  
Robert Winn, MD  
Leslie Zun, MD  
Judith Nocek, PhD

[Supplemental appendix 3: SCDIC Registry data collection forms \(REDCap data dictionary\)](#)

See attached .csv file.



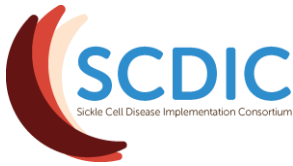

# Patient Enrollment Survey

Version 1.1 (11/28/2017)

Subject ID

We are interested in learning more about people who have sickle cell disease. As you complete this form, answer the questions as best as you can. If you don't know the answer or do not want to answer a question, you may leave it blank.

1. What is today's date?     |\_|\_|/|\_|\_|/|\_2\_|\_0\_|\_|\_|  
                                  Month    Day            Year
2. What is your year of birth?   |\_|\_|\_|\_|  
                                                  Year
3. How old are you today?   \_\_\_\_\_ years
4. How old were you when you were diagnosed with sickle cell disease?   |\_|\_|\_| years
5. What type of healthcare professional has been providing the majority of care for your sickle cell disease in the past 2 years?
  - Sickle cell specialist or hematologist (including all care providers in the SCD clinic)
  - Primary care or general practice
  - Emergency department
  - I don't currently receive care for my sickle cell disease

## A. YOUR PAIN HISTORY

6. Do you take pain medicine every day for your sickle cell disease?
  - Yes
  - No
7. In the past 12 months, how many sickle cell pain attacks (crises) did you have?
  - I did not have a pain attack in the past 12 months
  - 1
  - 2
  - 3
  - 4 or more
8. When was your last pain attack (crisis)?
  - I've never had a pain attack (crisis)
  - More than 5 years ago
  - 1-5 years ago
  - 7-11 months ago
  - 1-6 months ago
  - 1-3 weeks ago
  - Less than a week ago
  - I have one right now
9. How severe was your pain during your last pain attack (crisis)? **Circle a number from 0 to 10 below**, where 0 is no pain and 10 is the worst pain imaginable.

|   |   |   |   |   |   |   |   |   |   |    |
|---|---|---|---|---|---|---|---|---|---|----|
| 0 | 1 | 2 | 3 | 4 | 5 | 6 | 7 | 8 | 9 | 10 |
|---|---|---|---|---|---|---|---|---|---|----|

No pain

Worst pain imaginable

10. How much did your last pain attack (crisis) interfere with your life?

- I've never had a pain attack (crisis)
- Not at all, I did everything I usually do
- I had to cut down on some things I usually do
- I could not do most things I usually do
- I could not take care of myself and needed some help from family or friends
- I could not take care of myself and needed constant care from family, friends, doctors, or nurses

11. About how long did your most recent pain attack (crisis) last?

- I've never had a pain attack (crisis)
- Less than 1 hour
- 1-12 hours
- 13-23 hours
- 1-3 days
- 4-6 days
- 1-2 weeks
- More than 2 weeks

12. Think about your pain in the **past 7 days**, and answer the following questions.

|    |                                                                                    | Never                    | Rarely                   | Sometimes                | Often                    | Always                   |
|----|------------------------------------------------------------------------------------|--------------------------|--------------------------|--------------------------|--------------------------|--------------------------|
| a. | How often did you have very severe pain?                                           | <input type="checkbox"/> | <input type="checkbox"/> | <input type="checkbox"/> | <input type="checkbox"/> | <input type="checkbox"/> |
| b. | How often did you have pain so bad that it was hard to finish what you were doing? | <input type="checkbox"/> | <input type="checkbox"/> | <input type="checkbox"/> | <input type="checkbox"/> | <input type="checkbox"/> |

13. Now think about your pain in the **past 6 months**, and answer the following questions.

|    |                                                                                    | Never                    | Rarely                   | Sometimes                | Often                    | Always                   |
|----|------------------------------------------------------------------------------------|--------------------------|--------------------------|--------------------------|--------------------------|--------------------------|
| a. | How often did you have very severe pain?                                           | <input type="checkbox"/> | <input type="checkbox"/> | <input type="checkbox"/> | <input type="checkbox"/> | <input type="checkbox"/> |
| b. | How often did you have pain so bad that it was hard to finish what you were doing? | <input type="checkbox"/> | <input type="checkbox"/> | <input type="checkbox"/> | <input type="checkbox"/> | <input type="checkbox"/> |

14. Think about how your pain felt in the **past 7 days**, and answer the following questions.

|    |                                           | Not at all               | A little bit             | Somewhat                 | Quite a bit              | Very much                |
|----|-------------------------------------------|--------------------------|--------------------------|--------------------------|--------------------------|--------------------------|
| a. | Did your pain feel like pins and needles? | <input type="checkbox"/> | <input type="checkbox"/> | <input type="checkbox"/> | <input type="checkbox"/> | <input type="checkbox"/> |
| b. | Did your pain feel sore?                  | <input type="checkbox"/> | <input type="checkbox"/> | <input type="checkbox"/> | <input type="checkbox"/> | <input type="checkbox"/> |



## B. YOUR HISTORY OF HYDROXYUREA USE

15. Did a doctor **ever** suggest you take hydroxyurea?

- Yes
- No

16. What makes it difficult for you to take hydroxyurea or is there a reason why you do not take hydroxyurea? Please select one or more from the list below whether or not you have ever taken hydroxyurea.

- I have no difficulties or concerns using hydroxyurea
- I don't know enough about the medicine
- Sometimes I forget to take the medicine
- I am worried about side effects
- I don't like the frequent blood tests or clinic visits
- I'm feeling well and I don't think I need it
- The cost is more than I can afford
- I have heard that hydroxyurea may cause cancer
- I have heard that hydroxyurea may cause problems with having healthy children
- Other difficulty, specify \_\_\_\_\_

17. Have you **ever** taken hydroxyurea?

- Yes
- No → **skip to Question 23**

18. Have you experienced any side effects related to hydroxyurea?

- Yes
- No → **skip to Question 20**

19. What side effects have you experienced while you were taking hydroxyurea?

- Hair loss/thinning
- Nail blackening or discoloration
- Lowered blood counts (e.g., platelets, white count, hemoglobin)
- Low sperm count or other fertility problems
- Nausea/vomiting
- Skin ulcers
- Weight gain
- Headaches or dizziness
- Fatigue/drowsiness
- Other, specify \_\_\_\_\_

20. Are you **currently** on hydroxyurea?

- Yes
- No → **skip to Question 22**

21. How many days did you take hydroxyurea in the PAST WEEK?

- 0 days
- 1 day
- 2 days
- 3 days
- 4 days
- 5 days
- 6 days
- 7 days

**Skip to Section C, Question 23 after answering this question**

22. What is the reason you discontinued or stopped taking hydroxyurea?

- Side effects
- Yours/your family's preference
- Other reason, specify \_\_\_\_\_

### C. YOUR HISTORY OF BLOOD TRANSFUSIONS

23. Do you get regular blood transfusions for your sickle cell disease?

- Yes
- No

24. Estimate the number of units (pints) of blood that you have **ever** received.

- none
- 1 to 10
- 11 to 20
- 21 to 50
- 50-100
- more than 100
- Don't Know

25. Are you on iron chelation treatment **at this time**?

- Yes
- No

26. Have you **ever** been told that it is difficult to find blood for you (i.e., you have antibodies or react to other people's blood red blood cells)?

- Yes
- No
- Don't Know

27. Have you **ever** been referred for a bone marrow transplant?

- Yes
- No

### D. YOUR MEDICAL HISTORY

28. Has a doctor or nurse ever told you that you have or had any of the following conditions?

Please check YES or NO for each condition.

|    | Condition                                                              | YES                      | NO                       |
|----|------------------------------------------------------------------------|--------------------------|--------------------------|
| a. | Lung problems such as pneumonia or acute chest syndrome                | <input type="checkbox"/> | <input type="checkbox"/> |
| b. | Kidney damage                                                          | <input type="checkbox"/> | <input type="checkbox"/> |
| c. | Eye damage called retinopathy                                          | <input type="checkbox"/> | <input type="checkbox"/> |
| d. | Damage to your hip or shoulder due to sickle cell disease              | <input type="checkbox"/> | <input type="checkbox"/> |
| e. | High blood pressure in your lungs (also called pulmonary hypertension) | <input type="checkbox"/> | <input type="checkbox"/> |
| f. | Heart failure                                                          | <input type="checkbox"/> | <input type="checkbox"/> |
| g. | Blood clots in your legs or arms or that went to your lung             | <input type="checkbox"/> | <input type="checkbox"/> |
| h. | A stroke                                                               | <input type="checkbox"/> | <input type="checkbox"/> |
| i. | Asthma                                                                 | <input type="checkbox"/> | <input type="checkbox"/> |
| j. | Diabetes                                                               | <input type="checkbox"/> | <input type="checkbox"/> |

29. Have you ever had open sores on your legs or feet (leg ulcers)?

- Yes
- No

30. Has your spleen either been removed or seriously damaged due to sickle cell disease?

- Yes
- No

**E. MEDICATIONS YOU ARE TAKING AT THE PRESENT TIME**

31. Please list all medications you are **currently** taking.

| Name of Medication | Name of Medication |
|--------------------|--------------------|
| 1.                 | 6.                 |
| 2.                 | 7.                 |
| 3.                 | 8.                 |
| 4.                 | 9.                 |
| 5.                 | 10.                |

**F. BARRIERS TO YOUR MEDICAL CARE**

32. During the past 12 months, was there any time when you didn't get the medical care you needed or had delays in getting the care you needed?

- Yes
- No → *skip to Question 34*

33. Did you not get the medical care you needed or have delays getting medical care you needed for any of the following reasons?

- Worry about the cost
- The doctor or hospital wouldn't accept your health insurance
- Your health plan wouldn't pay for the treatment
- You couldn't get an appointment soon enough
- You couldn't get there when the doctor's office or clinic was open
- It takes too long to get to the doctor's office or clinic from your house or work
- You couldn't get through on the telephone
- You were too busy with work or other commitments to take the time
- You didn't think the problem was serious enough
- You had previous bad experiences with the health care system
- People at the doctor's office or clinic don't speak the same language I do
- Some other reason not listed above, please specify \_\_\_\_\_

## G. YOUR SOCIAL AND MENTAL HEALTH

34. Think about your sleep in the **past 7 days**, and answer the following questions.

|    |                                                                                | Never                    | Rarely                   | Sometimes                | Often                    | Always                   |
|----|--------------------------------------------------------------------------------|--------------------------|--------------------------|--------------------------|--------------------------|--------------------------|
| a. | How often did you stay up most of the night because you could not fall asleep? | <input type="checkbox"/> | <input type="checkbox"/> | <input type="checkbox"/> | <input type="checkbox"/> | <input type="checkbox"/> |
| b. | How often did you have a lot of trouble falling asleep?                        | <input type="checkbox"/> | <input type="checkbox"/> | <input type="checkbox"/> | <input type="checkbox"/> | <input type="checkbox"/> |

35. In the **past 7 days**, how often did the following happen?

|    |                                                                       | Never                    | Rarely (Once)            | Sometimes (2-3 times)    | Often (once a day)       | Very often (several times a day) |
|----|-----------------------------------------------------------------------|--------------------------|--------------------------|--------------------------|--------------------------|----------------------------------|
| a. | I had to read something several times to understand it.               | <input type="checkbox"/> | <input type="checkbox"/> | <input type="checkbox"/> | <input type="checkbox"/> | <input type="checkbox"/>         |
| b. | My thinking was slow.                                                 | <input type="checkbox"/> | <input type="checkbox"/> | <input type="checkbox"/> | <input type="checkbox"/> | <input type="checkbox"/>         |
| c. | I had to work really hard to pay attention or I would make a mistake. | <input type="checkbox"/> | <input type="checkbox"/> | <input type="checkbox"/> | <input type="checkbox"/> | <input type="checkbox"/>         |
| d. | I had trouble concentrating.                                          | <input type="checkbox"/> | <input type="checkbox"/> | <input type="checkbox"/> | <input type="checkbox"/> | <input type="checkbox"/>         |

36. How much DIFFICULTY do you **currently** have doing the following things?

|    |                                                                                                                                                                   | None                     | A little                 | Somewhat                 | A lot                    | Cannot do                |
|----|-------------------------------------------------------------------------------------------------------------------------------------------------------------------|--------------------------|--------------------------|--------------------------|--------------------------|--------------------------|
| a. | Reading and following complex instructions (e.g., directions for a new medication)?                                                                               | <input type="checkbox"/> | <input type="checkbox"/> | <input type="checkbox"/> | <input type="checkbox"/> | <input type="checkbox"/> |
| b. | Planning for and keeping appointments that are not part of your weekly routine (e.g, a therapy or doctor appointment, a social gathering with friends or family)? | <input type="checkbox"/> | <input type="checkbox"/> | <input type="checkbox"/> | <input type="checkbox"/> | <input type="checkbox"/> |
| c. | Managing your time to do most of your daily activities?                                                                                                           | <input type="checkbox"/> | <input type="checkbox"/> | <input type="checkbox"/> | <input type="checkbox"/> | <input type="checkbox"/> |
| d. | Learning new tasks or instructions?                                                                                                                               | <input type="checkbox"/> | <input type="checkbox"/> | <input type="checkbox"/> | <input type="checkbox"/> | <input type="checkbox"/> |

37. Think about how you felt in the **past 7 days**, and respond to each question or statement.

|    |                                                                      | Never                    | Rarely                   | Sometimes                | Often                    | Always                   |
|----|----------------------------------------------------------------------|--------------------------|--------------------------|--------------------------|--------------------------|--------------------------|
| a. | I felt worthless.                                                    | <input type="checkbox"/> | <input type="checkbox"/> | <input type="checkbox"/> | <input type="checkbox"/> | <input type="checkbox"/> |
| b. | I felt helpless.                                                     | <input type="checkbox"/> | <input type="checkbox"/> | <input type="checkbox"/> | <input type="checkbox"/> | <input type="checkbox"/> |
| c. | I felt depressed.                                                    | <input type="checkbox"/> | <input type="checkbox"/> | <input type="checkbox"/> | <input type="checkbox"/> | <input type="checkbox"/> |
| d. | I felt hopeless.                                                     | <input type="checkbox"/> | <input type="checkbox"/> | <input type="checkbox"/> | <input type="checkbox"/> | <input type="checkbox"/> |
| e. | How often did you feel completely hopeless because of your health?   | <input type="checkbox"/> | <input type="checkbox"/> | <input type="checkbox"/> | <input type="checkbox"/> | <input type="checkbox"/> |
| f. | How often were you very worried about needing to go to the hospital? | <input type="checkbox"/> | <input type="checkbox"/> | <input type="checkbox"/> | <input type="checkbox"/> | <input type="checkbox"/> |
|    |                                                                      | Not at all               | A little bit             | Somewhat                 | Quite a bit              | Very much                |
| g. | I felt tired.                                                        | <input type="checkbox"/> | <input type="checkbox"/> | <input type="checkbox"/> | <input type="checkbox"/> | <input type="checkbox"/> |

38. Have you ever been treated for depression?

- Yes, currently receiving treatment
- Yes, treated in the past but not now
- No, never received treatment

39. In the **past 30 days**, how much did the following happen?

|    |                                                                               | Not at all               | A little bit             | Somewhat                 | Quite a bit              | Very much                |
|----|-------------------------------------------------------------------------------|--------------------------|--------------------------|--------------------------|--------------------------|--------------------------|
| a. | How much did you rely on others to take care of you because of your health?   | <input type="checkbox"/> | <input type="checkbox"/> | <input type="checkbox"/> | <input type="checkbox"/> | <input type="checkbox"/> |
| b. | How much did your health make it hard for you to do things with your friends? | <input type="checkbox"/> | <input type="checkbox"/> | <input type="checkbox"/> | <input type="checkbox"/> | <input type="checkbox"/> |

## H. TELL US ABOUT YOURSELF

40. Are you male or female?

- Male
- Female

41. Do you consider yourself Hispanic/Latino or not Hispanic/Latino?

- Hispanic or Latino
- Not Hispanic or Latino

42. Which of the following five racial designations best describes you? More than one choice is acceptable.

- American Indian or Alaska Native
- Asian
- Black or African American
- Native Hawaiian or Pacific Islander
- White

43. In what language do you feel most comfortable speaking with your doctor or nurse?

- English
- Spanish
- Another language

44. What is your current marital status?

- Not Applicable (subject is a child)
- Married
- Living as married (including living with a partner)
- Divorced or separated
- Widowed
- Never married

45. How many children and adults, including yourself, live in your household at least 4 nights a week?

\_\_\_\_\_ # of children      \_\_\_\_\_ # of adults

46. What is your approximate yearly household income? Include income from all sources.

- \$25,000 and under
- \$25,001 - \$50,000
- \$50,001 - \$75,000
- \$75,001 - \$100,000
- >\$100,000

47. What is the highest grade or level of school you have completed or the highest degree you have received?

- Less than High School
- Some high school
- High school graduate or GED equivalent
- Some college or vocational training
- College graduate
- Some graduate school or professional school
- Graduate or professional degree

48. We would like to know about what you do -- are you working, looking for work, retired, keeping house, or what?

- Working now
- Only temporarily laid off, sick leave, or maternity leave
- Looking for work, unemployed
- Retired
- Disabled, permanently or temporarily
- Keeping house
- Student
- Other (Specify): \_\_\_\_\_

***This is the END of the survey. Please return it to the study coordinator.  
Thank you for your participation.***

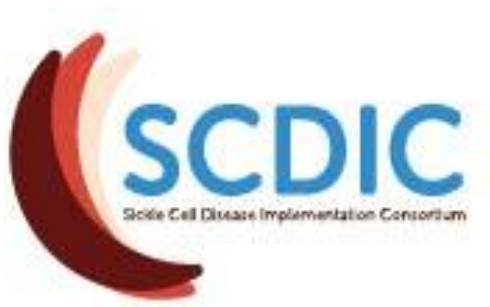

# PREGNANCY AND CONCEPTION FORM

## For Females

Final Version 1.1, 11/28/2017

This form asks questions about pregnancies you have had.

1. Have you ever been pregnant?
  - No → **SKIP TO QUESTION 13 ON THE BACK OF THIS FORM**
  - Yes
2. How many times have you been pregnant? Please be sure to include any pregnancies that ended in a live birth, miscarriage, stillbirth, or abortion. Enter the total number on the line below.

\_\_\_\_\_ total number of pregnancies in your lifetime

### INSTRUCTIONS FOR PAGES 2-3:

As you answer the questions on the following 2 pages, please think about each of the pregnancies that you have had. Start with the earliest pregnancy, listing it in the first column labeled “1<sup>st</sup> pregnancy”. From there, work forward until you have provided information about all of the pregnancies you listed in question 2 above. Then go to the back page and answer the remaining questions. Tell the study coordinator if you have had more than 6 pregnancies.

|    |                                                                                                                                       | 1st pregnancy                                                                                                                                                                                                                                             | 2nd pregnancy                                                                                                                                                                                                                                             | 3rd pregnancy                                                                                                                                                                                                                                             |
|----|---------------------------------------------------------------------------------------------------------------------------------------|-----------------------------------------------------------------------------------------------------------------------------------------------------------------------------------------------------------------------------------------------------------|-----------------------------------------------------------------------------------------------------------------------------------------------------------------------------------------------------------------------------------------------------------|-----------------------------------------------------------------------------------------------------------------------------------------------------------------------------------------------------------------------------------------------------------|
| 3. | In what month and year did this pregnancy <u>end</u> (enter due date if currently pregnant)?                                          | ____ / ____<br>Month / Year                                                                                                                                                                                                                               | ____ / ____<br>Month / Year                                                                                                                                                                                                                               | ____ / ____<br>Month / Year                                                                                                                                                                                                                               |
| 4. | What was the outcome of this pregnancy?                                                                                               | <input type="checkbox"/> Live birth<br><input type="checkbox"/> Still birth<br><input type="checkbox"/> Miscarriage<br><input type="checkbox"/> Abortion<br><input type="checkbox"/> Currently pregnant                                                   | <input type="checkbox"/> Live birth<br><input type="checkbox"/> Still birth<br><input type="checkbox"/> Miscarriage<br><input type="checkbox"/> Abortion<br><input type="checkbox"/> Currently pregnant                                                   | <input type="checkbox"/> Live birth<br><input type="checkbox"/> Still birth<br><input type="checkbox"/> Miscarriage<br><input type="checkbox"/> Abortion<br><input type="checkbox"/> Currently pregnant                                                   |
| 5. | Were you taking hydroxyurea at the <u>time of conception</u> (when the pregnancy started) or within the month before conception?      | <input type="checkbox"/> No<br><input type="checkbox"/> Yes<br><input type="checkbox"/> Don't remember                                                                                                                                                    | <input type="checkbox"/> No<br><input type="checkbox"/> Yes<br><input type="checkbox"/> Don't remember                                                                                                                                                    | <input type="checkbox"/> No<br><input type="checkbox"/> Yes<br><input type="checkbox"/> Don't remember                                                                                                                                                    |
| 6. | <u>During this pregnancy</u> were you taking hydroxyurea?<br><i>If yes, check all trimesters that apply or that you can remember.</i> | <input type="checkbox"/> No, did not take HU<br><input type="checkbox"/> Yes, during 1st trimester<br><input type="checkbox"/> Yes, during 2nd trimester<br><input type="checkbox"/> Yes, during 3rd trimester<br><input type="checkbox"/> Don't remember | <input type="checkbox"/> No, did not take HU<br><input type="checkbox"/> Yes, during 1st trimester<br><input type="checkbox"/> Yes, during 2nd trimester<br><input type="checkbox"/> Yes, during 3rd trimester<br><input type="checkbox"/> Don't remember | <input type="checkbox"/> No, did not take HU<br><input type="checkbox"/> Yes, during 1st trimester<br><input type="checkbox"/> Yes, during 2nd trimester<br><input type="checkbox"/> Yes, during 3rd trimester<br><input type="checkbox"/> Don't remember |
| 7. | Did you take any fertility drugs or receive any procedure from a health care worker to help you get pregnant with this pregnancy?     | <input type="checkbox"/> No<br><input type="checkbox"/> Yes                                                                                                                                                                                               | <input type="checkbox"/> No<br><input type="checkbox"/> Yes                                                                                                                                                                                               | <input type="checkbox"/> No<br><input type="checkbox"/> Yes                                                                                                                                                                                               |

**\*\* Answer Questions 8 – 12 below only if the pregnancy ended in a live birth**

|     |                                                                                                                                                                  | 1st pregnancy                                                                                                                                                                                                                                                                                                                                                      | 2nd pregnancy                                                                                                                                                                                                                                                                                                                                                      | 3rd pregnancy                                                                                                                                                                                                                                                                                                                                                      |
|-----|------------------------------------------------------------------------------------------------------------------------------------------------------------------|--------------------------------------------------------------------------------------------------------------------------------------------------------------------------------------------------------------------------------------------------------------------------------------------------------------------------------------------------------------------|--------------------------------------------------------------------------------------------------------------------------------------------------------------------------------------------------------------------------------------------------------------------------------------------------------------------------------------------------------------------|--------------------------------------------------------------------------------------------------------------------------------------------------------------------------------------------------------------------------------------------------------------------------------------------------------------------------------------------------------------------|
| 8.  | How many babies were born with this pregnancy?                                                                                                                   | _____ # of babies                                                                                                                                                                                                                                                                                                                                                  | _____ # of babies                                                                                                                                                                                                                                                                                                                                                  | _____ # of babies                                                                                                                                                                                                                                                                                                                                                  |
| 9.  | Was the baby (or babies) born prematurely?                                                                                                                       | <input type="checkbox"/> No, not born prematurely<br><input type="checkbox"/> Yes → enter how many weeks of gestation _____                                                                                                                                                                                                                                        | <input type="checkbox"/> No, not born prematurely<br><input type="checkbox"/> Yes → enter how many weeks of gestation _____                                                                                                                                                                                                                                        | <input type="checkbox"/> No, not born prematurely<br><input type="checkbox"/> Yes → enter how many weeks of gestation _____                                                                                                                                                                                                                                        |
| 10. | Did any of the babies in this pregnancy weigh <b>less than 5.5 pounds</b> at the time of birth?                                                                  | <input type="checkbox"/> No<br><input type="checkbox"/> Yes                                                                                                                                                                                                                                                                                                        | <input type="checkbox"/> No<br><input type="checkbox"/> Yes                                                                                                                                                                                                                                                                                                        | <input type="checkbox"/> No<br><input type="checkbox"/> Yes                                                                                                                                                                                                                                                                                                        |
| 11. | Did a doctor ever say a baby from this pregnancy had low birth weight, a birth defect, a genetic condition, or another serious medical problem related to birth? | <input type="checkbox"/> No<br><input type="checkbox"/> Yes → What condition?                                                                                                                                                                                                                                                                                      | <input type="checkbox"/> No<br><input type="checkbox"/> Yes → What condition?                                                                                                                                                                                                                                                                                      | <input type="checkbox"/> No<br><input type="checkbox"/> Yes → What condition?                                                                                                                                                                                                                                                                                      |
| 12. | Did you have any significant medical complications during this pregnancy?<br><br><i>Check all that apply</i>                                                     | <input type="checkbox"/> No complications<br><input type="checkbox"/> Pain crisis<br><input type="checkbox"/> Acute chest syndrome<br><input type="checkbox"/> Preeclampsia<br><input type="checkbox"/> Maternal diabetes<br><input type="checkbox"/> Transfusion required<br><input type="checkbox"/> Blood clots<br><input type="checkbox"/> Other specify _____ | <input type="checkbox"/> No complications<br><input type="checkbox"/> Pain crisis<br><input type="checkbox"/> Acute chest syndrome<br><input type="checkbox"/> Preeclampsia<br><input type="checkbox"/> Maternal diabetes<br><input type="checkbox"/> Transfusion required<br><input type="checkbox"/> Blood clots<br><input type="checkbox"/> Other specify _____ | <input type="checkbox"/> No complications<br><input type="checkbox"/> Pain crisis<br><input type="checkbox"/> Acute chest syndrome<br><input type="checkbox"/> Preeclampsia<br><input type="checkbox"/> Maternal diabetes<br><input type="checkbox"/> Transfusion required<br><input type="checkbox"/> Blood clots<br><input type="checkbox"/> Other specify _____ |



|    |                                                                                                                                       | 4th pregnancy                                                                                                                                                                                                                                             | 5th pregnancy                                                                                                                                                                                                                                             | 6th pregnancy                                                                                                                                                                                                                                             |
|----|---------------------------------------------------------------------------------------------------------------------------------------|-----------------------------------------------------------------------------------------------------------------------------------------------------------------------------------------------------------------------------------------------------------|-----------------------------------------------------------------------------------------------------------------------------------------------------------------------------------------------------------------------------------------------------------|-----------------------------------------------------------------------------------------------------------------------------------------------------------------------------------------------------------------------------------------------------------|
| 3. | In what month and year did this pregnancy <u>end</u> (enter due date if currently pregnant)?                                          | ____ / ____<br>Month / Year                                                                                                                                                                                                                               | ____ / ____<br>Month / Year                                                                                                                                                                                                                               | ____ / ____<br>Month / Year                                                                                                                                                                                                                               |
| 4. | What was the outcome of this pregnancy?                                                                                               | <input type="checkbox"/> Live birth<br><input type="checkbox"/> Still birth<br><input type="checkbox"/> Miscarriage<br><input type="checkbox"/> Abortion<br><input type="checkbox"/> Currently pregnant                                                   | <input type="checkbox"/> Live birth<br><input type="checkbox"/> Still birth<br><input type="checkbox"/> Miscarriage<br><input type="checkbox"/> Abortion<br><input type="checkbox"/> Currently pregnant                                                   | <input type="checkbox"/> Live birth<br><input type="checkbox"/> Still birth<br><input type="checkbox"/> Miscarriage<br><input type="checkbox"/> Abortion<br><input type="checkbox"/> Currently pregnant                                                   |
| 5. | Were you taking hydroxyurea at the <u>time of conception</u> (when the pregnancy started) or within the month before conception?      | <input type="checkbox"/> No<br><input type="checkbox"/> Yes<br><input type="checkbox"/> Don't remember                                                                                                                                                    | <input type="checkbox"/> No<br><input type="checkbox"/> Yes<br><input type="checkbox"/> Don't remember                                                                                                                                                    | <input type="checkbox"/> No<br><input type="checkbox"/> Yes<br><input type="checkbox"/> Don't remember                                                                                                                                                    |
| 6. | <u>During this pregnancy</u> were you taking hydroxyurea?<br><i>If yes, check all trimesters that apply or that you can remember.</i> | <input type="checkbox"/> No, did not take HU<br><input type="checkbox"/> Yes, during 1st trimester<br><input type="checkbox"/> Yes, during 2nd trimester<br><input type="checkbox"/> Yes, during 3rd trimester<br><input type="checkbox"/> Don't remember | <input type="checkbox"/> No, did not take HU<br><input type="checkbox"/> Yes, during 1st trimester<br><input type="checkbox"/> Yes, during 2nd trimester<br><input type="checkbox"/> Yes, during 3rd trimester<br><input type="checkbox"/> Don't remember | <input type="checkbox"/> No, did not take HU<br><input type="checkbox"/> Yes, during 1st trimester<br><input type="checkbox"/> Yes, during 2nd trimester<br><input type="checkbox"/> Yes, during 3rd trimester<br><input type="checkbox"/> Don't remember |
| 7. | Did you take any fertility drugs or receive any procedure from a health care worker to help you get pregnant with this pregnancy?     | <input type="checkbox"/> No<br><input type="checkbox"/> Yes                                                                                                                                                                                               | <input type="checkbox"/> No<br><input type="checkbox"/> Yes                                                                                                                                                                                               | <input type="checkbox"/> No<br><input type="checkbox"/> Yes                                                                                                                                                                                               |

**\*\* Answer Questions 8 – 12 below only if the pregnancy ended in a live birth**

|     |                                                                                                                                                                  | 4th pregnancy                                                                                                                                                                                                                                                                                                                                                      | 5th pregnancy                                                                                                                                                                                                                                                                                                                                                      | 6th pregnancy                                                                                                                                                                                                                                                                                                                                                      |
|-----|------------------------------------------------------------------------------------------------------------------------------------------------------------------|--------------------------------------------------------------------------------------------------------------------------------------------------------------------------------------------------------------------------------------------------------------------------------------------------------------------------------------------------------------------|--------------------------------------------------------------------------------------------------------------------------------------------------------------------------------------------------------------------------------------------------------------------------------------------------------------------------------------------------------------------|--------------------------------------------------------------------------------------------------------------------------------------------------------------------------------------------------------------------------------------------------------------------------------------------------------------------------------------------------------------------|
| 8.  | How many babies were born with this pregnancy?                                                                                                                   | _____ # of babies                                                                                                                                                                                                                                                                                                                                                  | _____ # of babies                                                                                                                                                                                                                                                                                                                                                  | _____ # of babies                                                                                                                                                                                                                                                                                                                                                  |
| 9.  | Was the baby (or babies) born prematurely?                                                                                                                       | <input type="checkbox"/> No, not born prematurely<br><input type="checkbox"/> Yes → enter how many weeks of gestation _____                                                                                                                                                                                                                                        | <input type="checkbox"/> No, not born prematurely<br><input type="checkbox"/> Yes → enter how many weeks of gestation _____                                                                                                                                                                                                                                        | <input type="checkbox"/> No, not born prematurely<br><input type="checkbox"/> Yes → enter how many weeks of gestation _____                                                                                                                                                                                                                                        |
| 10. | Did any of the babies in this pregnancy weigh <b>less than 5.5 pounds</b> at the time of birth?                                                                  | <input type="checkbox"/> No<br><input type="checkbox"/> Yes                                                                                                                                                                                                                                                                                                        | <input type="checkbox"/> No<br><input type="checkbox"/> Yes                                                                                                                                                                                                                                                                                                        | <input type="checkbox"/> No<br><input type="checkbox"/> Yes                                                                                                                                                                                                                                                                                                        |
| 11. | Did a doctor ever say a baby from this pregnancy had low birth weight, a birth defect, a genetic condition, or another serious medical problem related to birth? | <input type="checkbox"/> No<br><input type="checkbox"/> Yes → What condition?                                                                                                                                                                                                                                                                                      | <input type="checkbox"/> No<br><input type="checkbox"/> Yes → What condition?                                                                                                                                                                                                                                                                                      | <input type="checkbox"/> No<br><input type="checkbox"/> Yes → What condition?                                                                                                                                                                                                                                                                                      |
| 12. | Did you have any significant medical complications during this pregnancy?<br><br><i>Check all that apply</i>                                                     | <input type="checkbox"/> No complications<br><input type="checkbox"/> Pain crisis<br><input type="checkbox"/> Acute chest syndrome<br><input type="checkbox"/> Preeclampsia<br><input type="checkbox"/> Maternal diabetes<br><input type="checkbox"/> Transfusion required<br><input type="checkbox"/> Blood clots<br><input type="checkbox"/> Other specify _____ | <input type="checkbox"/> No complications<br><input type="checkbox"/> Pain crisis<br><input type="checkbox"/> Acute chest syndrome<br><input type="checkbox"/> Preeclampsia<br><input type="checkbox"/> Maternal diabetes<br><input type="checkbox"/> Transfusion required<br><input type="checkbox"/> Blood clots<br><input type="checkbox"/> Other specify _____ | <input type="checkbox"/> No complications<br><input type="checkbox"/> Pain crisis<br><input type="checkbox"/> Acute chest syndrome<br><input type="checkbox"/> Preeclampsia<br><input type="checkbox"/> Maternal diabetes<br><input type="checkbox"/> Transfusion required<br><input type="checkbox"/> Blood clots<br><input type="checkbox"/> Other specify _____ |

13. Has there ever been a time in your life during which you didn't become pregnant despite 12 or more months of regular unprotected intercourse?
- No → **SKIP TO END**
  - Yes
14. Did you ever go to a doctor or other medical care provider to talk about ways to help you have a baby?
- Yes
  - No → **GO TO QUESTION 16**
15. Which of the services did you have to help you have a baby? Check all that apply.
- Advice
  - Infertility testing
  - Drugs to improve ovulation
  - Surgery to correct blocked tubes
  - Artificial insemination
  - Other types of medical help
16. Has a doctor or other medical care provider ever told you that you had fibroid tumors or myomas in your uterus?
- Yes
  - No
17. Has a doctor or other medical care provider ever told you that you had endometriosis?
- Yes
  - No

***THIS IS THE END OF THE FORM. THANK YOU FOR YOUR PARTICIPATION.  
PLEASE RETURN THE FORM TO THE STUDY COORDINATOR.***

**Instructions to Coordinator:** Use this form for subjects with more than 6 pregnancies. Record the number of additional pregnancies and give this form to the patient to provide the information on the additional pregnancies.

|    |                                                                                                                                                  | ___ pregnancy                                                                                                                                                                                                                                             | ___ pregnancy                                                                                                                                                                                                                                             | ___ pregnancy                                                                                                                                                                                                                                             |
|----|--------------------------------------------------------------------------------------------------------------------------------------------------|-----------------------------------------------------------------------------------------------------------------------------------------------------------------------------------------------------------------------------------------------------------|-----------------------------------------------------------------------------------------------------------------------------------------------------------------------------------------------------------------------------------------------------------|-----------------------------------------------------------------------------------------------------------------------------------------------------------------------------------------------------------------------------------------------------------|
| 3. | In what month and year did this pregnancy <u>end</u> (enter due date if currently pregnant)?                                                     | ____ / ____<br>Month / Year                                                                                                                                                                                                                               | ____ / ____<br>Month / Year                                                                                                                                                                                                                               | ____ / ____<br>Month / Year                                                                                                                                                                                                                               |
| 4. | What was the outcome of this pregnancy?                                                                                                          | <input type="checkbox"/> Live birth<br><input type="checkbox"/> Still birth<br><input type="checkbox"/> Miscarriage<br><input type="checkbox"/> Abortion<br><input type="checkbox"/> Currently pregnant                                                   | <input type="checkbox"/> Live birth<br><input type="checkbox"/> Still birth<br><input type="checkbox"/> Miscarriage<br><input type="checkbox"/> Abortion<br><input type="checkbox"/> Currently pregnant                                                   | <input type="checkbox"/> Live birth<br><input type="checkbox"/> Still birth<br><input type="checkbox"/> Miscarriage<br><input type="checkbox"/> Abortion<br><input type="checkbox"/> Currently pregnant                                                   |
| 5. | Were you taking hydroxyurea at the <u>time of conception</u> (when the pregnancy started) or within the month before conception?                 | <input type="checkbox"/> No<br><input type="checkbox"/> Yes<br><input type="checkbox"/> Don't remember                                                                                                                                                    | <input type="checkbox"/> No<br><input type="checkbox"/> Yes<br><input type="checkbox"/> Don't remember                                                                                                                                                    | <input type="checkbox"/> No<br><input type="checkbox"/> Yes<br><input type="checkbox"/> Don't remember                                                                                                                                                    |
| 6. | <p><u>During this pregnancy</u> were you taking hydroxyurea?</p> <p><i>If yes, check all trimesters that apply or that you can remember.</i></p> | <input type="checkbox"/> No, did not take HU<br><input type="checkbox"/> Yes, during 1st trimester<br><input type="checkbox"/> Yes, during 2nd trimester<br><input type="checkbox"/> Yes, during 3rd trimester<br><input type="checkbox"/> Don't remember | <input type="checkbox"/> No, did not take HU<br><input type="checkbox"/> Yes, during 1st trimester<br><input type="checkbox"/> Yes, during 2nd trimester<br><input type="checkbox"/> Yes, during 3rd trimester<br><input type="checkbox"/> Don't remember | <input type="checkbox"/> No, did not take HU<br><input type="checkbox"/> Yes, during 1st trimester<br><input type="checkbox"/> Yes, during 2nd trimester<br><input type="checkbox"/> Yes, during 3rd trimester<br><input type="checkbox"/> Don't remember |
| 7. | Did you take any fertility drugs or receive any procedure from a health care worker to help you get pregnant with this pregnancy?                | <input type="checkbox"/> No<br><input type="checkbox"/> Yes                                                                                                                                                                                               | <input type="checkbox"/> No<br><input type="checkbox"/> Yes                                                                                                                                                                                               | <input type="checkbox"/> No<br><input type="checkbox"/> Yes                                                                                                                                                                                               |

**\*\* Answer Questions 8 – 12 below only if the pregnancy ended in a live birth**

|     |                                                                                                                                                                  | ___ pregnancy<br>(same # as above)                                                                                                                                                                                                                                                                                                                                 | ___ pregnancy<br>(same # as above)                                                                                                                                                                                                                                                                                                                                 | ___ pregnancy<br>(same # as above)                                                                                                                                                                                                                                                                                                                                 |
|-----|------------------------------------------------------------------------------------------------------------------------------------------------------------------|--------------------------------------------------------------------------------------------------------------------------------------------------------------------------------------------------------------------------------------------------------------------------------------------------------------------------------------------------------------------|--------------------------------------------------------------------------------------------------------------------------------------------------------------------------------------------------------------------------------------------------------------------------------------------------------------------------------------------------------------------|--------------------------------------------------------------------------------------------------------------------------------------------------------------------------------------------------------------------------------------------------------------------------------------------------------------------------------------------------------------------|
| 8.  | How many babies were born with this pregnancy?                                                                                                                   | _____ # of babies                                                                                                                                                                                                                                                                                                                                                  | _____ # of babies                                                                                                                                                                                                                                                                                                                                                  | _____ # of babies                                                                                                                                                                                                                                                                                                                                                  |
| 9.  | Was the baby (or babies) born prematurely?                                                                                                                       | <input type="checkbox"/> No, not born prematurely<br><input type="checkbox"/> Yes → enter how many weeks of gestation _____                                                                                                                                                                                                                                        | <input type="checkbox"/> No, not born prematurely<br><input type="checkbox"/> Yes → enter how many weeks of gestation _____                                                                                                                                                                                                                                        | <input type="checkbox"/> No, not born prematurely<br><input type="checkbox"/> Yes → enter how many weeks of gestation _____                                                                                                                                                                                                                                        |
| 10. | Did any of the babies in this pregnancy weigh <b>less than 5.5 pounds</b> at the time of birth?                                                                  | <input type="checkbox"/> No<br><input type="checkbox"/> Yes                                                                                                                                                                                                                                                                                                        | <input type="checkbox"/> No<br><input type="checkbox"/> Yes                                                                                                                                                                                                                                                                                                        | <input type="checkbox"/> No<br><input type="checkbox"/> Yes                                                                                                                                                                                                                                                                                                        |
| 11. | Did a doctor ever say a baby from this pregnancy had low birth weight, a birth defect, a genetic condition, or another serious medical problem related to birth? | <input type="checkbox"/> No<br><input type="checkbox"/> Yes → What condition?                                                                                                                                                                                                                                                                                      | <input type="checkbox"/> No<br><input type="checkbox"/> Yes → What condition?                                                                                                                                                                                                                                                                                      | <input type="checkbox"/> No<br><input type="checkbox"/> Yes → What condition?                                                                                                                                                                                                                                                                                      |
| 12. | <p>Did you have any significant medical complications during this pregnancy?</p> <p><i>Check all that apply</i></p>                                              | <input type="checkbox"/> No complications<br><input type="checkbox"/> Pain crisis<br><input type="checkbox"/> Acute chest syndrome<br><input type="checkbox"/> Preeclampsia<br><input type="checkbox"/> Maternal diabetes<br><input type="checkbox"/> Transfusion required<br><input type="checkbox"/> Blood clots<br><input type="checkbox"/> Other specify _____ | <input type="checkbox"/> No complications<br><input type="checkbox"/> Pain crisis<br><input type="checkbox"/> Acute chest syndrome<br><input type="checkbox"/> Preeclampsia<br><input type="checkbox"/> Maternal diabetes<br><input type="checkbox"/> Transfusion required<br><input type="checkbox"/> Blood clots<br><input type="checkbox"/> Other specify _____ | <input type="checkbox"/> No complications<br><input type="checkbox"/> Pain crisis<br><input type="checkbox"/> Acute chest syndrome<br><input type="checkbox"/> Preeclampsia<br><input type="checkbox"/> Maternal diabetes<br><input type="checkbox"/> Transfusion required<br><input type="checkbox"/> Blood clots<br><input type="checkbox"/> Other specify _____ |

|    |                                                                                                                                       | ____ pregnancy                                                                                                                                                                                                                                            | ____ pregnancy                                                                                                                                                                                                                                            | ____ pregnancy                                                                                                                                                                                                                                            |
|----|---------------------------------------------------------------------------------------------------------------------------------------|-----------------------------------------------------------------------------------------------------------------------------------------------------------------------------------------------------------------------------------------------------------|-----------------------------------------------------------------------------------------------------------------------------------------------------------------------------------------------------------------------------------------------------------|-----------------------------------------------------------------------------------------------------------------------------------------------------------------------------------------------------------------------------------------------------------|
| 3. | In what month and year did this pregnancy <u>end</u> (enter due date if currently pregnant)?                                          | ____ / ____<br>Month / Year                                                                                                                                                                                                                               | ____ / ____<br>Month / Year                                                                                                                                                                                                                               | ____ / ____<br>Month / Year                                                                                                                                                                                                                               |
| 4. | What was the outcome of this pregnancy?                                                                                               | <input type="checkbox"/> Live birth<br><input type="checkbox"/> Still birth<br><input type="checkbox"/> Miscarriage<br><input type="checkbox"/> Abortion<br><input type="checkbox"/> Currently pregnant                                                   | <input type="checkbox"/> Live birth<br><input type="checkbox"/> Still birth<br><input type="checkbox"/> Miscarriage<br><input type="checkbox"/> Abortion<br><input type="checkbox"/> Currently pregnant                                                   | <input type="checkbox"/> Live birth<br><input type="checkbox"/> Still birth<br><input type="checkbox"/> Miscarriage<br><input type="checkbox"/> Abortion<br><input type="checkbox"/> Currently pregnant                                                   |
| 5. | Were you taking hydroxyurea at the <u>time of conception</u> (when the pregnancy started) or within the month before conception?      | <input type="checkbox"/> No<br><input type="checkbox"/> Yes<br><input type="checkbox"/> Don't remember                                                                                                                                                    | <input type="checkbox"/> No<br><input type="checkbox"/> Yes<br><input type="checkbox"/> Don't remember                                                                                                                                                    | <input type="checkbox"/> No<br><input type="checkbox"/> Yes<br><input type="checkbox"/> Don't remember                                                                                                                                                    |
| 6. | <u>During this pregnancy</u> were you taking hydroxyurea?<br><i>If yes, check all trimesters that apply or that you can remember.</i> | <input type="checkbox"/> No, did not take HU<br><input type="checkbox"/> Yes, during 1st trimester<br><input type="checkbox"/> Yes, during 2nd trimester<br><input type="checkbox"/> Yes, during 3rd trimester<br><input type="checkbox"/> Don't remember | <input type="checkbox"/> No, did not take HU<br><input type="checkbox"/> Yes, during 1st trimester<br><input type="checkbox"/> Yes, during 2nd trimester<br><input type="checkbox"/> Yes, during 3rd trimester<br><input type="checkbox"/> Don't remember | <input type="checkbox"/> No, did not take HU<br><input type="checkbox"/> Yes, during 1st trimester<br><input type="checkbox"/> Yes, during 2nd trimester<br><input type="checkbox"/> Yes, during 3rd trimester<br><input type="checkbox"/> Don't remember |
| 7. | Did you take any fertility drugs or receive any procedure from a health care worker to help you get pregnant with this pregnancy?     | <input type="checkbox"/> No<br><input type="checkbox"/> Yes                                                                                                                                                                                               | <input type="checkbox"/> No<br><input type="checkbox"/> Yes                                                                                                                                                                                               | <input type="checkbox"/> No<br><input type="checkbox"/> Yes                                                                                                                                                                                               |

**\*\* Answer Questions 8 – 12 below only if the pregnancy ended in a live birth**

|     |                                                                                                                                                                  | ____ pregnancy<br>(same # as above)                                                                                                                                                                                                                                                                                                                                | ____ pregnancy<br>(same # as above)                                                                                                                                                                                                                                                                                                                                | ____ pregnancy<br>(same # as above)                                                                                                                                                                                                                                                                                                                                |
|-----|------------------------------------------------------------------------------------------------------------------------------------------------------------------|--------------------------------------------------------------------------------------------------------------------------------------------------------------------------------------------------------------------------------------------------------------------------------------------------------------------------------------------------------------------|--------------------------------------------------------------------------------------------------------------------------------------------------------------------------------------------------------------------------------------------------------------------------------------------------------------------------------------------------------------------|--------------------------------------------------------------------------------------------------------------------------------------------------------------------------------------------------------------------------------------------------------------------------------------------------------------------------------------------------------------------|
| 8.  | How many babies were born with this pregnancy?                                                                                                                   | ____ # of babies                                                                                                                                                                                                                                                                                                                                                   | ____ # of babies                                                                                                                                                                                                                                                                                                                                                   | ____ # of babies                                                                                                                                                                                                                                                                                                                                                   |
| 9.  | Was the baby (or babies) born prematurely?                                                                                                                       | <input type="checkbox"/> No, not born prematurely<br><input type="checkbox"/> Yes → enter how many weeks of gestation _____                                                                                                                                                                                                                                        | <input type="checkbox"/> No, not born prematurely<br><input type="checkbox"/> Yes → enter how many weeks of gestation _____                                                                                                                                                                                                                                        | <input type="checkbox"/> No, not born prematurely<br><input type="checkbox"/> Yes → enter how many weeks of gestation _____                                                                                                                                                                                                                                        |
| 10. | Did any of the babies in this pregnancy weigh <b>less than 5.5 pounds</b> at the time of birth?                                                                  | <input type="checkbox"/> No<br><input type="checkbox"/> Yes                                                                                                                                                                                                                                                                                                        | <input type="checkbox"/> No<br><input type="checkbox"/> Yes                                                                                                                                                                                                                                                                                                        | <input type="checkbox"/> No<br><input type="checkbox"/> Yes                                                                                                                                                                                                                                                                                                        |
| 11. | Did a doctor ever say a baby from this pregnancy had low birth weight, a birth defect, a genetic condition, or another serious medical problem related to birth? | <input type="checkbox"/> No<br><input type="checkbox"/> Yes → What condition?                                                                                                                                                                                                                                                                                      | <input type="checkbox"/> No<br><input type="checkbox"/> Yes → What condition?                                                                                                                                                                                                                                                                                      | <input type="checkbox"/> No<br><input type="checkbox"/> Yes → What condition?                                                                                                                                                                                                                                                                                      |
| 12. | Did you have any significant medical complications during this pregnancy?<br><br><i>Check all that apply</i>                                                     | <input type="checkbox"/> No complications<br><input type="checkbox"/> Pain crisis<br><input type="checkbox"/> Acute chest syndrome<br><input type="checkbox"/> Preeclampsia<br><input type="checkbox"/> Maternal diabetes<br><input type="checkbox"/> Transfusion required<br><input type="checkbox"/> Blood clots<br><input type="checkbox"/> Other specify _____ | <input type="checkbox"/> No complications<br><input type="checkbox"/> Pain crisis<br><input type="checkbox"/> Acute chest syndrome<br><input type="checkbox"/> Preeclampsia<br><input type="checkbox"/> Maternal diabetes<br><input type="checkbox"/> Transfusion required<br><input type="checkbox"/> Blood clots<br><input type="checkbox"/> Other specify _____ | <input type="checkbox"/> No complications<br><input type="checkbox"/> Pain crisis<br><input type="checkbox"/> Acute chest syndrome<br><input type="checkbox"/> Preeclampsia<br><input type="checkbox"/> Maternal diabetes<br><input type="checkbox"/> Transfusion required<br><input type="checkbox"/> Blood clots<br><input type="checkbox"/> Other specify _____ |

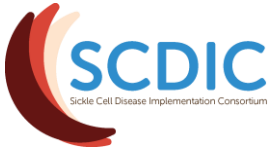

# PREGNANCY AND CONCEPTION FORM

## For Males

Subject ID

Final Version 1.1, 11/286/2017

This form asks questions about pregnancies where you have been the father.

1. Have you ever fathered a baby?

- No → **SKIP TO QUESTION 10 ON THE BACK OF THIS FORM**
- Yes

2. How many times have you fathered a baby? Please be sure to include any pregnancies that are current or ended in a live birth, miscarriage, stillbirth, or abortion. Enter the total number on the line below.

\_\_\_\_\_ total number of pregnancies where you have been the father

**INSTRUCTIONS FOR QUESTIONS 3-9:**

As you answer the questions on the following 2 pages, please think about each of the pregnancies where you have been the father. Start with the earliest pregnancy, listing it in the first column labeled “1<sup>st</sup> pregnancy”. From there, work forward until you have provided information about all of the pregnancies you listed in question 2 above. Then go to the back page and answer the remaining questions. Tell the study coordinator if you have fathered more than 8 pregnancies.

|    |                                                                                                                                  | 1st pregnancy                                                                                                                                                                                           | 2nd pregnancy                                                                                                                                                                                           | 3rd pregnancy                                                                                                                                                                                           |
|----|----------------------------------------------------------------------------------------------------------------------------------|---------------------------------------------------------------------------------------------------------------------------------------------------------------------------------------------------------|---------------------------------------------------------------------------------------------------------------------------------------------------------------------------------------------------------|---------------------------------------------------------------------------------------------------------------------------------------------------------------------------------------------------------|
| 3. | In what month and year did this pregnancy <u>end</u> (or due date if currently pregnancy)?                                       | _____/_____<br>Month / Year                                                                                                                                                                             | _____/_____<br>Month / Year                                                                                                                                                                             | _____/_____<br>Month / Year                                                                                                                                                                             |
| 4. | What was the outcome of this pregnancy?                                                                                          | <input type="checkbox"/> Live birth<br><input type="checkbox"/> Still birth<br><input type="checkbox"/> Miscarriage<br><input type="checkbox"/> Abortion<br><input type="checkbox"/> Currently pregnant | <input type="checkbox"/> Live birth<br><input type="checkbox"/> Still birth<br><input type="checkbox"/> Miscarriage<br><input type="checkbox"/> Abortion<br><input type="checkbox"/> Currently pregnant | <input type="checkbox"/> Live birth<br><input type="checkbox"/> Still birth<br><input type="checkbox"/> Miscarriage<br><input type="checkbox"/> Abortion<br><input type="checkbox"/> Currently pregnant |
| 5. | Were you taking hydroxyurea at the <u>time of conception</u> (when the pregnancy started) or within the month before conception? | <input type="checkbox"/> No<br><input type="checkbox"/> Yes<br><input type="checkbox"/> Don't remember                                                                                                  | <input type="checkbox"/> No<br><input type="checkbox"/> Yes<br><input type="checkbox"/> Don't remember                                                                                                  | <input type="checkbox"/> No<br><input type="checkbox"/> Yes<br><input type="checkbox"/> Don't remember                                                                                                  |

**\*\* Answer Questions 6 – 9 below only if the pregnancy ended in a live birth**

|    |                                                                                                                                                                  | 1st pregnancy                                                                                                               | 2nd pregnancy                                                                                                               | 3rd pregnancy                                                                                                               |
|----|------------------------------------------------------------------------------------------------------------------------------------------------------------------|-----------------------------------------------------------------------------------------------------------------------------|-----------------------------------------------------------------------------------------------------------------------------|-----------------------------------------------------------------------------------------------------------------------------|
| 6. | How many babies were born with this pregnancy?                                                                                                                   | _____ # of babies                                                                                                           | _____ # of babies                                                                                                           | _____ # of babies                                                                                                           |
| 7. | Was the baby (or babies) born prematurely?                                                                                                                       | <input type="checkbox"/> No, not born prematurely<br><input type="checkbox"/> Yes → enter how many weeks of gestation _____ | <input type="checkbox"/> No, not born prematurely<br><input type="checkbox"/> Yes → enter how many weeks of gestation _____ | <input type="checkbox"/> No, not born prematurely<br><input type="checkbox"/> Yes → enter how many weeks of gestation _____ |
| 8. | Did any of the babies in this pregnancy weigh <b>less than 5.5 pounds</b> at the time of birth?                                                                  | <input type="checkbox"/> No<br><input type="checkbox"/> Yes<br><input type="checkbox"/> Don't know                          | <input type="checkbox"/> No<br><input type="checkbox"/> Yes<br><input type="checkbox"/> Don't know                          | <input type="checkbox"/> No<br><input type="checkbox"/> Yes<br><input type="checkbox"/> Don't know                          |
| 9. | Did a doctor ever say a baby from this pregnancy had low birth weight, a birth defect, a genetic condition, or another serious medical problem related to birth? | <input type="checkbox"/> No<br><input type="checkbox"/> Yes → What condition?                                               | <input type="checkbox"/> No<br><input type="checkbox"/> Yes → What condition?                                               | <input type="checkbox"/> No<br><input type="checkbox"/> Yes → What condition?                                               |

|    |                                                                                                                                  | 4th pregnancy                                                                                                                                                                                           | 5th pregnancy                                                                                                                                                                                           | 6th pregnancy                                                                                                                                                                                           |
|----|----------------------------------------------------------------------------------------------------------------------------------|---------------------------------------------------------------------------------------------------------------------------------------------------------------------------------------------------------|---------------------------------------------------------------------------------------------------------------------------------------------------------------------------------------------------------|---------------------------------------------------------------------------------------------------------------------------------------------------------------------------------------------------------|
| 3. | In what month and year did this pregnancy <u>end</u> (or due date if currently pregnant)?                                        | ____ / ____<br>Month / Year                                                                                                                                                                             | ____ / ____<br>Month / Year                                                                                                                                                                             | ____ / ____<br>Month / Year                                                                                                                                                                             |
| 4. | What was the outcome of this pregnancy?                                                                                          | <input type="checkbox"/> Live birth<br><input type="checkbox"/> Still birth<br><input type="checkbox"/> Miscarriage<br><input type="checkbox"/> Abortion<br><input type="checkbox"/> Currently pregnant | <input type="checkbox"/> Live birth<br><input type="checkbox"/> Still birth<br><input type="checkbox"/> Miscarriage<br><input type="checkbox"/> Abortion<br><input type="checkbox"/> Currently pregnant | <input type="checkbox"/> Live birth<br><input type="checkbox"/> Still birth<br><input type="checkbox"/> Miscarriage<br><input type="checkbox"/> Abortion<br><input type="checkbox"/> Currently pregnant |
| 5. | Were you taking hydroxyurea at the <u>time of conception</u> (when the pregnancy started) or within the month before conception? | <input type="checkbox"/> No<br><input type="checkbox"/> Yes<br><input type="checkbox"/> Don't remember                                                                                                  | <input type="checkbox"/> No<br><input type="checkbox"/> Yes<br><input type="checkbox"/> Don't remember                                                                                                  | <input type="checkbox"/> No<br><input type="checkbox"/> Yes<br><input type="checkbox"/> Don't remember                                                                                                  |

**\*\* Answer Questions 6 – 9 below only if the pregnancy ended in a live birth**

|    |                                                                                                                                                                  | 4th pregnancy                                                                                                               | 5th pregnancy                                                                                                               | 6th pregnancy                                                                                                               |
|----|------------------------------------------------------------------------------------------------------------------------------------------------------------------|-----------------------------------------------------------------------------------------------------------------------------|-----------------------------------------------------------------------------------------------------------------------------|-----------------------------------------------------------------------------------------------------------------------------|
| 6. | How many babies were born with this pregnancy?                                                                                                                   | _____ # of babies                                                                                                           | _____ # of babies                                                                                                           | _____ # of babies                                                                                                           |
| 7. | Was the baby (or babies) born prematurely?                                                                                                                       | <input type="checkbox"/> No, not born prematurely<br><input type="checkbox"/> Yes → enter how many weeks of gestation _____ | <input type="checkbox"/> No, not born prematurely<br><input type="checkbox"/> Yes → enter how many weeks of gestation _____ | <input type="checkbox"/> No, not born prematurely<br><input type="checkbox"/> Yes → enter how many weeks of gestation _____ |
| 8. | Did any of the babies in this pregnancy weigh <b>less than 5.5 pounds</b> at the time of birth?                                                                  | <input type="checkbox"/> No<br><input type="checkbox"/> Yes<br><input type="checkbox"/> Don't know                          | <input type="checkbox"/> No<br><input type="checkbox"/> Yes<br><input type="checkbox"/> Don't know                          | <input type="checkbox"/> No<br><input type="checkbox"/> Yes<br><input type="checkbox"/> Don't know                          |
| 9. | Did a doctor ever say a baby from this pregnancy had low birth weight, a birth defect, a genetic condition, or another serious medical problem related to birth? | <input type="checkbox"/> No<br><input type="checkbox"/> Yes → What condition?                                               | <input type="checkbox"/> No<br><input type="checkbox"/> Yes → What condition?                                               | <input type="checkbox"/> No<br><input type="checkbox"/> Yes → What condition?                                               |

10. Have you ever had a painful continuous erection, which is also called priapism?

- No  
 Yes

11. Has there ever been a time in your life during which you weren't able to get your partner pregnant despite 12 or more months of regular unprotected intercourse?

- No → **FORM COMPLETE**  
 Yes

12. Did you ever go to a doctor or other medical care provider to talk about ways to help you father a baby?

- No → **FORM COMPLETE**  
 Yes → **GO TO QUESTION 13**

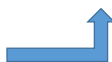

13. Which of the following services did you have to help you father a baby? Check all the apply.

- Advice  
 Infertility testing  
 Surgery to reverse a vasectomy  
 Treatment for varicocele  
 Other types of medical help

14. When you went for medical help to father a baby, were you ever told that you had any of the following male infertility problems? Check all that apply.

- Sperm or semen problems  
 Varicocele  
 Other  
 None of the above

**This is the END of the survey. Thank you for your participation. Please return the form to the study coordinator.**

**Instructions to Coordinator:** Use this form for subjects with more than 6 pregnancies. Record the number of additional pregnancies and give this form to the patient to provide the information on the additional pregnancies .

|    |                                                                                                                                  | ____ pregnancy                                                                                                                                                                                          | ____ pregnancy                                                                                                                                                                                          | ____ pregnancy                                                                                                                                                                                          |
|----|----------------------------------------------------------------------------------------------------------------------------------|---------------------------------------------------------------------------------------------------------------------------------------------------------------------------------------------------------|---------------------------------------------------------------------------------------------------------------------------------------------------------------------------------------------------------|---------------------------------------------------------------------------------------------------------------------------------------------------------------------------------------------------------|
| 3. | In what month and year did this pregnancy <u>end</u> (or due date if currently pregnancy)?                                       | ____ / ____<br>Month / Year                                                                                                                                                                             | ____ / ____<br>Month / Year                                                                                                                                                                             | ____ / ____<br>Month / Year                                                                                                                                                                             |
| 4. | What was the outcome of this pregnancy?                                                                                          | <input type="checkbox"/> Live birth<br><input type="checkbox"/> Still birth<br><input type="checkbox"/> Miscarriage<br><input type="checkbox"/> Abortion<br><input type="checkbox"/> Currently pregnant | <input type="checkbox"/> Live birth<br><input type="checkbox"/> Still birth<br><input type="checkbox"/> Miscarriage<br><input type="checkbox"/> Abortion<br><input type="checkbox"/> Currently pregnant | <input type="checkbox"/> Live birth<br><input type="checkbox"/> Still birth<br><input type="checkbox"/> Miscarriage<br><input type="checkbox"/> Abortion<br><input type="checkbox"/> Currently pregnant |
| 5. | Were you taking hydroxyurea at the <u>time of conception</u> (when the pregnancy started) or within the month before conception? | <input type="checkbox"/> No<br><input type="checkbox"/> Yes<br><input type="checkbox"/> Don't remember                                                                                                  | <input type="checkbox"/> No<br><input type="checkbox"/> Yes<br><input type="checkbox"/> Don't remember                                                                                                  | <input type="checkbox"/> No<br><input type="checkbox"/> Yes<br><input type="checkbox"/> Don't remember                                                                                                  |

**\*\* Answer Questions 6 – 9 below only if the pregnancy ended in a live birth**

|    |                                                                                                                                                                  | ____ pregnancy<br>(same # as above)                                                                                         | ____ pregnancy<br>(same # as above)                                                                                         | ____ pregnancy<br>(same # as above)                                                                                         |
|----|------------------------------------------------------------------------------------------------------------------------------------------------------------------|-----------------------------------------------------------------------------------------------------------------------------|-----------------------------------------------------------------------------------------------------------------------------|-----------------------------------------------------------------------------------------------------------------------------|
| 6. | How many babies were born with this pregnancy?                                                                                                                   | _____ # of babies                                                                                                           | _____ # of babies                                                                                                           | _____ # of babies                                                                                                           |
| 7. | Was the baby (or babies) born prematurely?                                                                                                                       | <input type="checkbox"/> No, not born prematurely<br><input type="checkbox"/> Yes → enter how many weeks of gestation _____ | <input type="checkbox"/> No, not born prematurely<br><input type="checkbox"/> Yes → enter how many weeks of gestation _____ | <input type="checkbox"/> No, not born prematurely<br><input type="checkbox"/> Yes → enter how many weeks of gestation _____ |
| 8. | Did any of the babies in this pregnancy weigh <b>less than 5.5 pounds</b> at the time of birth?                                                                  | <input type="checkbox"/> No<br><input type="checkbox"/> Yes<br><input type="checkbox"/> Don't know                          | <input type="checkbox"/> No<br><input type="checkbox"/> Yes<br><input type="checkbox"/> Don't know                          | <input type="checkbox"/> No<br><input type="checkbox"/> Yes<br><input type="checkbox"/> Don't know                          |
| 9. | Did a doctor ever say a baby from this pregnancy had low birth weight, a birth defect, a genetic condition, or another serious medical problem related to birth? | <input type="checkbox"/> No<br><input type="checkbox"/> Yes → What condition?                                               | <input type="checkbox"/> No<br><input type="checkbox"/> Yes → What condition?                                               | <input type="checkbox"/> No<br><input type="checkbox"/> Yes → What condition?                                               |

|    |                                                                                                                                  | ____ pregnancy                                                                                                                                                                                          | ____ pregnancy                                                                                                                                                                                          | ____ pregnancy                                                                                                                                                                                          |
|----|----------------------------------------------------------------------------------------------------------------------------------|---------------------------------------------------------------------------------------------------------------------------------------------------------------------------------------------------------|---------------------------------------------------------------------------------------------------------------------------------------------------------------------------------------------------------|---------------------------------------------------------------------------------------------------------------------------------------------------------------------------------------------------------|
| 3. | In what month and year did this pregnancy <u>end</u> (or due date if currently pregnant)?                                        | ____ / ____<br>Month / Year                                                                                                                                                                             | ____ / ____<br>Month / Year                                                                                                                                                                             | ____ / ____<br>Month / Year                                                                                                                                                                             |
| 4. | What was the outcome of this pregnancy?                                                                                          | <input type="checkbox"/> Live birth<br><input type="checkbox"/> Still birth<br><input type="checkbox"/> Miscarriage<br><input type="checkbox"/> Abortion<br><input type="checkbox"/> Currently pregnant | <input type="checkbox"/> Live birth<br><input type="checkbox"/> Still birth<br><input type="checkbox"/> Miscarriage<br><input type="checkbox"/> Abortion<br><input type="checkbox"/> Currently pregnant | <input type="checkbox"/> Live birth<br><input type="checkbox"/> Still birth<br><input type="checkbox"/> Miscarriage<br><input type="checkbox"/> Abortion<br><input type="checkbox"/> Currently pregnant |
| 5. | Were you taking hydroxyurea at the <u>time of conception</u> (when the pregnancy started) or within the month before conception? | <input type="checkbox"/> No<br><input type="checkbox"/> Yes<br><input type="checkbox"/> Don't remember                                                                                                  | <input type="checkbox"/> No<br><input type="checkbox"/> Yes<br><input type="checkbox"/> Don't remember                                                                                                  | <input type="checkbox"/> No<br><input type="checkbox"/> Yes<br><input type="checkbox"/> Don't remember                                                                                                  |

**\*\* Answer Questions 6 – 9 below only if the pregnancy ended in a live birth**

|    |                                                                                                                                                                  | ____ pregnancy<br>(same # as above)                                                                                         | ____ pregnancy<br>(same # as above)                                                                                         | ____ pregnancy<br>(same # as above)                                                                                         |
|----|------------------------------------------------------------------------------------------------------------------------------------------------------------------|-----------------------------------------------------------------------------------------------------------------------------|-----------------------------------------------------------------------------------------------------------------------------|-----------------------------------------------------------------------------------------------------------------------------|
| 6. | How many babies were born with this pregnancy?                                                                                                                   | _____ # of babies                                                                                                           | _____ # of babies                                                                                                           | _____ # of babies                                                                                                           |
| 7. | Was the baby (or babies) born prematurely?                                                                                                                       | <input type="checkbox"/> No, not born prematurely<br><input type="checkbox"/> Yes → enter how many weeks of gestation _____ | <input type="checkbox"/> No, not born prematurely<br><input type="checkbox"/> Yes → enter how many weeks of gestation _____ | <input type="checkbox"/> No, not born prematurely<br><input type="checkbox"/> Yes → enter how many weeks of gestation _____ |
| 8. | Did any of the babies in this pregnancy weigh <b>less than 5.5 pounds</b> at the time of birth?                                                                  | <input type="checkbox"/> No<br><input type="checkbox"/> Yes<br><input type="checkbox"/> Don't know                          | <input type="checkbox"/> No<br><input type="checkbox"/> Yes<br><input type="checkbox"/> Don't know                          | <input type="checkbox"/> No<br><input type="checkbox"/> Yes<br><input type="checkbox"/> Don't know                          |
| 9. | Did a doctor ever say a baby from this pregnancy had low birth weight, a birth defect, a genetic condition, or another serious medical problem related to birth? | <input type="checkbox"/> No<br><input type="checkbox"/> Yes → What condition?                                               | <input type="checkbox"/> No<br><input type="checkbox"/> Yes → What condition?                                               | <input type="checkbox"/> No<br><input type="checkbox"/> Yes → What condition?                                               |



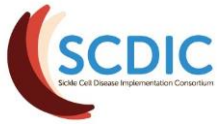

# Patient Registration Form

Version 2 (7/2/2018)

Subject ID Label

By entering this form into the DMS, you are entering this subject into the SCDIC Registry database. The REDCap survey is accessible after the SCD diagnosis status is entered. Demographics should be completed for eligible subjects only.

## Registration Checklist:

- The subject provided signed consent to participate in the Registry on \_\_\_\_\_.  
(DATE)
  - Assent form signed (minors only)
- The subject completed the patient survey via the following mode (check one):
  - Interview; hard copy
  - Interview; online entry
  - Interview: phone
  - Self-administered; hard copy
  - Self-administered; online entry

## Diagnosis Status:

- Confirmed (with documentation) by newborn screening, hemoglobin fractionation, hemoglobin electrophoresis or DNA sequencing
- Pending – DO NOT ENTER DEMOGRAPHICS INTO DMS UNTIL CONFIRMED
- Unable to Confirm, subject not eligible – FORM COMPLETE

**\*\*\*\*\*PATIENT SURVEY IS NOW ACCESSIBLE IN REDCap\*\*\*\*\***

## Subject Demographics for Confirmed Diagnoses Only:

1. Date of birth ||/||||||  
(mm/dd/yyyy)
2. Race (check all that apply)
  - American Indian or Alaska Native
  - Asian
  - Black or African American
  - Native Hawaiian or Pacific Islander
  - White
3. Ethnicity (check one)
  - Hispanic or Latino
  - Not Hispanic or Latino
4. Sex
  - Male
  - Female
5. Zip code of primary residence |||||

Unaffiliated patients have NOT been seen by a sickle cell provider (non-acute setting) as an outpatient in the past 2 years [for new patients, this excludes the visit during which they were enrolled].

6. Is this patient unaffiliated?
  - Yes
  - No

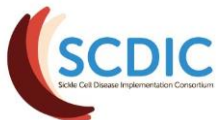

# Medical Record Abstraction Form

Subject ID Label

If date or age is not available, enter '99'.

Name of Abstractor: \_\_\_\_\_

1. DATE OF ENROLLMENT: |\_\_|\_|\_|-|\_\_|\_|\_|-|\_\_|\_|\_|\_|\_|

2. Location where person enrolled:

- |                                                                |                                                          |
|----------------------------------------------------------------|----------------------------------------------------------|
| <input type="checkbox"/> Routine visit--main SCDIC center      | <input type="checkbox"/> Hospital in-patient             |
| <input type="checkbox"/> Routine visit--satellite SCDIC center | <input type="checkbox"/> Primary Care offices            |
| <input type="checkbox"/> Emergency Department                  | <input type="checkbox"/> Community event (e.g. SCD walk) |
| <input type="checkbox"/> Acute Pain Center                     | <input type="checkbox"/> Other _____                     |

3. Confirmed enrollment diagnosis: (CHECK ONLY ONE). DIAGNOSIS MUST BE SUPPORTED BY SOURCE DOCUMENTATION.

| Diagnosis                             |                          |
|---------------------------------------|--------------------------|
| a. Hb SS or sickle cell anemia        | <input type="checkbox"/> |
| b. Hb SC disease                      | <input type="checkbox"/> |
| c. Hb S beta <sup>0</sup> thalassemia | <input type="checkbox"/> |
| d. Hb S beta <sup>+</sup> thalassemia | <input type="checkbox"/> |

| Diagnosis                                           |                          |
|-----------------------------------------------------|--------------------------|
| e. Hb S hereditary persistence of fetal Hb (S/HPFH) | <input type="checkbox"/> |
| f. Hb SE                                            | <input type="checkbox"/> |
| g. Hb SD                                            | <input type="checkbox"/> |
| h. Hb SO                                            | <input type="checkbox"/> |

- a. What was the basis for diagnosis?
- |                                                     |
|-----------------------------------------------------|
| <input type="checkbox"/> Newborn screening          |
| <input type="checkbox"/> Hemoglobin fractionation   |
| <input type="checkbox"/> Hemoglobin electrophoresis |
| <input type="checkbox"/> DNA sequencing             |

4. Approximate age of first diagnosis (physician confirmed): \_\_\_\_\_ AGE In YEARS **OR**  NEWBORN SCREENING **OR**  UNKNOWN

**For subjects age 15-25 at time of enrollment:**

- a. Date of most recent visit to pediatric sickle cell provider. |\_\_|\_|-|\_\_|\_|-|\_\_|\_|\_|\_|  DATE UNAVAILABLE  
 Date of first visit to adult sickle cell provider. |\_\_|\_|-|\_\_|\_|-|\_\_|\_|\_|\_|  DATE UNAVAILABLE  
 HAS NOT SEEN ADULT PROVIDER

**FORM COMPLETE, MEDICAL RECORDS NOT AVAILABLE**

5. Ever tested for alpha-thalassemia?

- Yes—single alpha globin gene deleted
- Yes—two alpha globin genes deleted
- Yes—negative
- No—not evaluated
- Unknown

| Basic Measurements<br>(most recent)       | Not in<br>Record         | Measurements                                                                                            | Date<br>(mm/yyyy) | Steady<br>state? |
|-------------------------------------------|--------------------------|---------------------------------------------------------------------------------------------------------|-------------------|------------------|
| 6. Height                                 | <input type="checkbox"/> | _ _ _ _  CM                                                                                             |                   | Y N              |
| 7. Weight                                 | <input type="checkbox"/> | _ _ _ _ . _ _  KG                                                                                       |                   | Y N              |
| 8. Temperature                            | <input type="checkbox"/> | _ _ _ . _ _  Celsius                                                                                    |                   | Y N              |
| 9. Heart Rate                             | <input type="checkbox"/> | _ _ _ _  BEATS/MINUTE                                                                                   |                   | Y N              |
| 10. Respiration Rate                      | <input type="checkbox"/> | _ _ _ _  BREATHS/MINUTE                                                                                 |                   | Y N              |
| 11. Oxygen saturation (SpO <sub>2</sub> ) | <input type="checkbox"/> | _ _ _  %                                                                                                |                   | Y N              |
| 12. Blood Pressure                        | <input type="checkbox"/> | _ _ _  /  _ _ _ <br>ON ANTI-HYPERTENSIVE MEDS? <input type="checkbox"/> Yes <input type="checkbox"/> No |                   | Y N              |

13. Has the subject ever used hydroxyurea?  Yes  No → SKIP TO MEDICATION TABLE ON NEXT PAGE
- a. Start date (mm/yyyy) \_\_\_\_\_/\_\_\_\_\_/\_\_\_\_\_
- b. Stop/last date (mm/yyyy) \_\_\_\_\_/\_\_\_\_\_/\_\_\_\_\_
- c. Total duration of use \_\_\_\_\_  Months or  Years  Unknown
- d. Current dose \_\_\_\_\_ Mg/kg or \_\_\_\_\_ Mg

14. Please list all medications the subject is **currently** taking (at time of enrollment).  NONE CURRENTLY BEING USED

| Name of Medication | Name of Medication |
|--------------------|--------------------|
| a.                 | k.                 |
| b.                 | l.                 |
| c.                 | m.                 |
| d.                 | n.                 |
| e.                 | o.                 |
| f.                 | p.                 |

| Most recent visit to ....                     | Not in record            | Visit/Admission Date (mm/yyyy) | Length of stay (in days) | Was visit for acute pain?                                | # of total visits in past year for acute pain/crisis |
|-----------------------------------------------|--------------------------|--------------------------------|--------------------------|----------------------------------------------------------|------------------------------------------------------|
| 15. Acute Pain/Infusion Center (not admitted) | <input type="checkbox"/> |                                |                          | <input type="checkbox"/> Yes <input type="checkbox"/> No |                                                      |
| 16. Emergency Department (not admitted)       | <input type="checkbox"/> |                                |                          | <input type="checkbox"/> Yes <input type="checkbox"/> No |                                                      |
| 17. Hospitalization                           | <input type="checkbox"/> |                                |                          | <input type="checkbox"/> Yes <input type="checkbox"/> No |                                                      |

| Most recent visit to...                                                  | Not in record            | Visit Date (mm/yyyy) | Most recent visit to....             | Not in record            | Visit Date (mm/yyyy) |
|--------------------------------------------------------------------------|--------------------------|----------------------|--------------------------------------|--------------------------|----------------------|
| 18. Primary care physician (i.e. family/internal medicine, pediatrician) | <input type="checkbox"/> |                      | 19. Behavioral medicine/psychiatrist | <input type="checkbox"/> |                      |
| 20. Hematologist                                                         | <input type="checkbox"/> |                      | 21. Orthopedic surgeon               | <input type="checkbox"/> |                      |
| 22. Nephrologist                                                         | <input type="checkbox"/> |                      | 23. Ophthalmologist                  | <input type="checkbox"/> |                      |
| 24. Cardiologist                                                         | <input type="checkbox"/> |                      | 25. Neurologist                      | <input type="checkbox"/> |                      |
| 26. Pulmonologist                                                        | <input type="checkbox"/> |                      | 27. OB/GYN                           | <input type="checkbox"/> |                      |

**Transfusion History at Clinic Site**

|                        | None                     | # ever had | # total units | First time (mm/yyyy) | Last time (mm/yyyy) | Reason stopped                                                                                                                                              | Frequency                                                                                                                                                                      | Type                                                                                                      |
|------------------------|--------------------------|------------|---------------|----------------------|---------------------|-------------------------------------------------------------------------------------------------------------------------------------------------------------|--------------------------------------------------------------------------------------------------------------------------------------------------------------------------------|-----------------------------------------------------------------------------------------------------------|
| 28. Episodic, simple   | <input type="checkbox"/> |            |               |                      |                     |                                                                                                                                                             | <input type="checkbox"/> Less than once/year<br><input type="checkbox"/> About once a year<br><input type="checkbox"/> More than once/year<br><input type="checkbox"/> Unknown |                                                                                                           |
| 29. Chronic, simple    | <input type="checkbox"/> |            |               |                      |                     | <input type="checkbox"/> Hemochromatosis<br><input type="checkbox"/> Alloimmunization<br><input type="checkbox"/> Other<br><input type="checkbox"/> Unknown | <input type="checkbox"/> Once every 4 weeks<br><input type="checkbox"/> Once every 6 weeks<br><input type="checkbox"/> Once every 8 weeks<br><input type="checkbox"/> Unknown  |                                                                                                           |
| 30. Episodic, exchange | <input type="checkbox"/> |            |               |                      |                     |                                                                                                                                                             | <input type="checkbox"/> Less than once/year<br><input type="checkbox"/> About once a year<br><input type="checkbox"/> More than once/year<br><input type="checkbox"/> Unknown | <input type="checkbox"/> Automated<br><input type="checkbox"/> Manual<br><input type="checkbox"/> Unknown |
| 31. Chronic, exchange  | <input type="checkbox"/> |            |               |                      |                     | <input type="checkbox"/> Hemochromatosis<br><input type="checkbox"/> Alloimmunization<br><input type="checkbox"/> Other<br><input type="checkbox"/> Unknown | <input type="checkbox"/> Once every 4 weeks<br><input type="checkbox"/> Once every 6 weeks<br><input type="checkbox"/> Once every 8 weeks<br><input type="checkbox"/> Unknown  | <input type="checkbox"/> Automated<br><input type="checkbox"/> Manual<br><input type="checkbox"/> Unknown |

| <b>SCD Complications</b><br>Indicate whether the subject has <u>ever</u> had each condition and the date it was most recently diagnosed. | <b>No</b>                | <b>Not in record</b>     | <b>Yes</b>               | <b>Most recent dx (record age OR date)</b> |                       |
|------------------------------------------------------------------------------------------------------------------------------------------|--------------------------|--------------------------|--------------------------|--------------------------------------------|-----------------------|
|                                                                                                                                          |                          |                          |                          | <b>Age</b>                                 | <b>Date (mm/yyyy)</b> |
| <b>Musculoskeletal</b>                                                                                                                   |                          |                          |                          |                                            |                       |
| 32. Avascular necrosis ( <i>check all that apply</i> )                                                                                   | <input type="checkbox"/> | <input type="checkbox"/> | <input type="checkbox"/> |                                            |                       |
| a. Hip                                                                                                                                   | <input type="checkbox"/> | <input type="checkbox"/> | <input type="checkbox"/> |                                            |                       |
| b. Shoulder                                                                                                                              | <input type="checkbox"/> | <input type="checkbox"/> | <input type="checkbox"/> |                                            |                       |
| c. Knee                                                                                                                                  | <input type="checkbox"/> | <input type="checkbox"/> | <input type="checkbox"/> |                                            |                       |
| 33. Dactylitis                                                                                                                           | <input type="checkbox"/> | <input type="checkbox"/> | <input type="checkbox"/> |                                            |                       |
| 34. Osteomyelitis                                                                                                                        | <input type="checkbox"/> | <input type="checkbox"/> | <input type="checkbox"/> |                                            |                       |
| <b>Genitourinary</b>                                                                                                                     |                          |                          |                          |                                            |                       |
| 35. Chronic kidney disease                                                                                                               | <input type="checkbox"/> | <input type="checkbox"/> | <input type="checkbox"/> |                                            |                       |
| 36. End stage renal disease                                                                                                              | <input type="checkbox"/> | <input type="checkbox"/> | <input type="checkbox"/> |                                            |                       |
| a. Kidney transplant                                                                                                                     | <input type="checkbox"/> | <input type="checkbox"/> | <input type="checkbox"/> |                                            |                       |
| 37. Priapism                                                                                                                             | <input type="checkbox"/> | <input type="checkbox"/> | <input type="checkbox"/> |                                            |                       |
| <b>Nervous system</b>                                                                                                                    |                          |                          |                          |                                            |                       |
| 38. Stroke ( <i>check all that apply</i> )                                                                                               | <input type="checkbox"/> | <input type="checkbox"/> | <input type="checkbox"/> |                                            |                       |
| a. Ischemic                                                                                                                              | <input type="checkbox"/> | <input type="checkbox"/> | <input type="checkbox"/> |                                            |                       |
| b. Hemorrhagic                                                                                                                           | <input type="checkbox"/> | <input type="checkbox"/> | <input type="checkbox"/> |                                            |                       |
| c. Transient ischemic attack (TIA)                                                                                                       | <input type="checkbox"/> | <input type="checkbox"/> | <input type="checkbox"/> |                                            |                       |
| d. Silent                                                                                                                                | <input type="checkbox"/> | <input type="checkbox"/> | <input type="checkbox"/> |                                            |                       |
| 39. Intracranial bleeding                                                                                                                | <input type="checkbox"/> | <input type="checkbox"/> | <input type="checkbox"/> |                                            |                       |
| <b>Cardiovascular</b>                                                                                                                    |                          |                          |                          |                                            |                       |
| 40. Pulmonary arterial hypertension                                                                                                      | <input type="checkbox"/> | <input type="checkbox"/> | <input type="checkbox"/> |                                            |                       |
| a. Mean pulmonary artery pressure > or = to 25 mm Hg                                                                                     | <input type="checkbox"/> | <input type="checkbox"/> | <input type="checkbox"/> |                                            |                       |
| b. Tricuspid regurgitation velocity (TRV) > or = to 3.0 m/sec                                                                            | <input type="checkbox"/> | <input type="checkbox"/> | <input type="checkbox"/> |                                            |                       |
| 41. Left ventricular dysfunction                                                                                                         | <input type="checkbox"/> | <input type="checkbox"/> | <input type="checkbox"/> |                                            |                       |
| <b>Respiratory</b>                                                                                                                       |                          |                          |                          |                                            |                       |
| 42. Acute chest syndrome                                                                                                                 | <input type="checkbox"/> | <input type="checkbox"/> | <input type="checkbox"/> |                                            |                       |
| 43. Asthma                                                                                                                               | <input type="checkbox"/> | <input type="checkbox"/> | <input type="checkbox"/> |                                            |                       |
| <b>Digestive</b>                                                                                                                         |                          |                          |                          |                                            |                       |
| 44. Gallstones/cholelithiasis, cholecystitis                                                                                             | <input type="checkbox"/> | <input type="checkbox"/> | <input type="checkbox"/> |                                            |                       |
| 45. Splenomegaly ( <i>check all that apply</i> )                                                                                         | <input type="checkbox"/> | <input type="checkbox"/> | <input type="checkbox"/> |                                            |                       |
| a. Splenic sequestration                                                                                                                 | <input type="checkbox"/> | <input type="checkbox"/> | <input type="checkbox"/> |                                            |                       |
| b. Splenic infarcts                                                                                                                      | <input type="checkbox"/> | <input type="checkbox"/> | <input type="checkbox"/> |                                            |                       |
| c. Hypersplenism                                                                                                                         | <input type="checkbox"/> | <input type="checkbox"/> | <input type="checkbox"/> |                                            |                       |
| d. Splenectomy                                                                                                                           | <input type="checkbox"/> | <input type="checkbox"/> | <input type="checkbox"/> |                                            |                       |
| <b>Other Autoimmune/Inflammatory</b>                                                                                                     |                          |                          |                          |                                            |                       |
| 46. Deep vein thrombosis (DVT)                                                                                                           | <input type="checkbox"/> | <input type="checkbox"/> | <input type="checkbox"/> |                                            |                       |
| a. Pulmonary embolism                                                                                                                    | <input type="checkbox"/> | <input type="checkbox"/> | <input type="checkbox"/> |                                            |                       |
| b. Venous thromboembolism (VTE)                                                                                                          | <input type="checkbox"/> | <input type="checkbox"/> | <input type="checkbox"/> |                                            |                       |
| 47. Lupus                                                                                                                                | <input type="checkbox"/> | <input type="checkbox"/> | <input type="checkbox"/> |                                            |                       |
| 48. Rheumatoid arthritis                                                                                                                 | <input type="checkbox"/> | <input type="checkbox"/> | <input type="checkbox"/> |                                            |                       |
| 49. Gout                                                                                                                                 | <input type="checkbox"/> | <input type="checkbox"/> | <input type="checkbox"/> |                                            |                       |
| 50. Sarcoidosis                                                                                                                          | <input type="checkbox"/> | <input type="checkbox"/> | <input type="checkbox"/> |                                            |                       |
| 51. Other autoimmune or inflammatory, specify:                                                                                           | <input type="checkbox"/> | <input type="checkbox"/> | <input type="checkbox"/> |                                            |                       |

| Other Conditions                                           | No                       | Not in record            | Yes                      | Most recent dx (record age OR date) |                |
|------------------------------------------------------------|--------------------------|--------------------------|--------------------------|-------------------------------------|----------------|
|                                                            |                          |                          |                          | Age                                 | Date (mm/yyyy) |
| 52. Multi-organ failure ( <i>check all that apply</i> )    | <input type="checkbox"/> | <input type="checkbox"/> | <input type="checkbox"/> |                                     |                |
| a. ICU                                                     | <input type="checkbox"/> | <input type="checkbox"/> | <input type="checkbox"/> |                                     |                |
| b. Intubation                                              | <input type="checkbox"/> | <input type="checkbox"/> | <input type="checkbox"/> |                                     |                |
| c. Simple transfusion                                      | <input type="checkbox"/> | <input type="checkbox"/> | <input type="checkbox"/> |                                     |                |
| d. Exchange transfusion                                    | <input type="checkbox"/> | <input type="checkbox"/> | <input type="checkbox"/> |                                     |                |
| e. Hemodialysis                                            | <input type="checkbox"/> | <input type="checkbox"/> | <input type="checkbox"/> |                                     |                |
| f. Peritoneal dialysis                                     | <input type="checkbox"/> | <input type="checkbox"/> | <input type="checkbox"/> |                                     |                |
| 53. Pneumococcal sepsis (Pulmonary)                        | <input type="checkbox"/> | <input type="checkbox"/> | <input type="checkbox"/> |                                     |                |
| 54. Skin ulcers (Integumentary)                            | <input type="checkbox"/> | <input type="checkbox"/> | <input type="checkbox"/> |                                     |                |
| 55. Retinopathy (Ocular)                                   | <input type="checkbox"/> | <input type="checkbox"/> | <input type="checkbox"/> |                                     |                |
| 56. Diabetes mellitus (other systemic)                     | <input type="checkbox"/> | <input type="checkbox"/> | <input type="checkbox"/> |                                     |                |
| 57. Iron overload (Other)                                  | <input type="checkbox"/> | <input type="checkbox"/> | <input type="checkbox"/> |                                     |                |
| 58. Chronic refractory pain (Other)                        | <input type="checkbox"/> | <input type="checkbox"/> | <input type="checkbox"/> |                                     |                |
| 59. Anxiety (Mental health)                                | <input type="checkbox"/> | <input type="checkbox"/> | <input type="checkbox"/> |                                     |                |
| 60. Depression (Mental health)                             | <input type="checkbox"/> | <input type="checkbox"/> | <input type="checkbox"/> |                                     |                |
| 61. Other psychiatric disorder (Mental health)<br>Specify: | <input type="checkbox"/> | <input type="checkbox"/> | <input type="checkbox"/> |                                     |                |

62. Has the subject ever been diagnosed with cancer?

- Yes
- No → GO TO Q 63
- Don't know → GO TO Q 63

IF YES: For each primary cancer, complete a row in the table:

|    | Cancer Type & Location | Stage | When diagnosed?<br>(record age or date) |                |
|----|------------------------|-------|-----------------------------------------|----------------|
|    |                        |       | Age                                     | Date (mm/yyyy) |
| a. |                        |       |                                         |                |
| b. |                        |       |                                         |                |

63. What kind of health insurance or health care coverage does the subject have at the time of enrollment? (Choose all that apply.)

- None
- Private health insurance
- Medicare
- Medicaid, Medical Assistance (MA), the Children's Health Insurance Program (CHIP), or any kind of state or government-sponsored assistance.
- TRICARE or other military health care, including VA health care
- Other type of health insurance, specify: \_\_\_\_\_

64. Year of first visit in medical record: \_\_\_\_|\_\_\_\_|\_\_\_\_|\_\_\_\_  Subject not seen at this institution

PI review and sign-off: \_\_\_\_\_

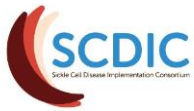

# Laboratory Reporting Form

Subject ID Label

Complete using medical records, using values from the subject in steady state.

Abstractor: \_\_\_\_\_

| Test Name                                     | Units                                                        | Date of Most Recent | NA                       |
|-----------------------------------------------|--------------------------------------------------------------|---------------------|--------------------------|
| 1. Nucleated RBC                              | _ _ _ . _  10 <sup>3</sup> /mm <sup>3</sup>                  | ___/___/___         | <input type="checkbox"/> |
| 2. White Blood Cells                          | _ _ _ . _  10 <sup>3</sup> /mm <sup>3</sup>                  | ___/___/___         | <input type="checkbox"/> |
| 3. RBC                                        | _ _ _ . _  10 <sup>6</sup> /mm <sup>3</sup>                  | ___/___/___         | <input type="checkbox"/> |
| 4. Hemoglobin                                 | _ _ _ . _  g/dL                                              | ___/___/___         | <input type="checkbox"/> |
| 5. Hematocrit                                 | _ _ _ . _  %                                                 | ___/___/___         | <input type="checkbox"/> |
| 6. MCV                                        | _ _ _  micrometer <sup>3</sup>                               | ___/___/___         | <input type="checkbox"/> |
| 7. MCH                                        | _ _ _ . _  pg                                                | ___/___/___         | <input type="checkbox"/> |
| 8. MCHC                                       | _ _ _ . _  g/dL                                              | ___/___/___         | <input type="checkbox"/> |
| 9. Platelets                                  | _ _ _ _  10 <sup>3</sup> /mm <sup>3</sup>                    | ___/___/___         | <input type="checkbox"/> |
| 10. Neutrophils (segmented and band together) | _ _ _  %                                                     | ___/___/___         | <input type="checkbox"/> |
| 11. Lymphocytes                               | _ _ _  %                                                     | ___/___/___         | <input type="checkbox"/> |
| 12. Monocytes                                 | _ _ _  %                                                     | ___/___/___         | <input type="checkbox"/> |
| 13. Reticulocytes                             | _ _ _ . _  % AND/OR<br> _ _ _ _  10 <sup>3</sup> /microliter | ___/___/___         | <input type="checkbox"/> |
| 14. Serum BUN                                 | _ _ _ . _  mg/dL                                             | ___/___/___         | <input type="checkbox"/> |
| 15. Serum Creatinine                          | _ _ . _  mg/dL                                               | ___/___/___         | <input type="checkbox"/> |
| 17. Estimated creatinine clearance            | _ _ _ _  mL/min                                              | ___/___/___         | <input type="checkbox"/> |
| 18. Total Cholesterol                         | _ _ _ _  mg/dL                                               | ___/___/___         | <input type="checkbox"/> |
| 19. Non-Fasting HDL                           | _ _ _ _  mg/dL                                               | ___/___/___         | <input type="checkbox"/> |
| 20. Fasting HDL                               | _ _ _ _  mg/dL                                               | ___/___/___         | <input type="checkbox"/> |
| 21. Non-Fasting LDL                           | _ _ _ _  mg/dL                                               | ___/___/___         | <input type="checkbox"/> |
| 22. Fasting LDL                               | _ _ _ _  mg/dL                                               | ___/___/___         | <input type="checkbox"/> |
| 23. Triglyceride                              | _ _ _ _  mg/dL                                               | ___/___/___         | <input type="checkbox"/> |
| 24. Non-Fasting Blood Glucose                 | _ _ _ _  mg/dL                                               | ___/___/___         | <input type="checkbox"/> |
| 25. Fasting Blood Glucose                     | _ _ _ _  mg/dL                                               | ___/___/___         | <input type="checkbox"/> |
| 26. CRP                                       | _ _ _ . _  mg/dL                                             | ___/___/___         | <input type="checkbox"/> |
| 27. Bilirubin serum, total                    | _ _ _ . _  mg/dL                                             | ___/___/___         | <input type="checkbox"/> |
| 28. Bilirubin, serum, direct                  | _ _ _ . _  mg/dL                                             | ___/___/___         | <input type="checkbox"/> |
| 29. AST                                       | _ _ _ . _  U/L                                               | ___/___/___         | <input type="checkbox"/> |

| Test Name                                              | Units                                                                                                                                              | Date of Most Recent | NA                       |
|--------------------------------------------------------|----------------------------------------------------------------------------------------------------------------------------------------------------|---------------------|--------------------------|
| 30. ALT                                                | _ _ _ .  _ _  U/L                                                                                                                                  | ___/___/___         | <input type="checkbox"/> |
| 31. Alkaline Phosphatase                               | _ _ _ _ .  _ _  U/L                                                                                                                                | ___/___/___         | <input type="checkbox"/> |
| 32. Total Protein (plasma)                             | _ _ _ .  _ _  g/dL                                                                                                                                 | ___/___/___         | <input type="checkbox"/> |
| 33. Albumin                                            | _ _ _ .  _ _  g/dL                                                                                                                                 | ___/___/___         | <input type="checkbox"/> |
| 34. LDH (serum)                                        | _ _ _ _  U/L                                                                                                                                       | ___/___/___         | <input type="checkbox"/> |
| 35. NT-pro-BNP                                         | _ _ _ _ _  pg/mL                                                                                                                                   | ___/___/___         | <input type="checkbox"/> |
| 36. BNP                                                | _ _ _ _ _  pg/mL                                                                                                                                   | ___/___/___         | <input type="checkbox"/> |
| 37. Serum iron                                         | _ _ _ _  ug/dL                                                                                                                                     | ___/___/___         | <input type="checkbox"/> |
| 38. Total iron binding capacity (TIBC)                 | _ _ _ _  ug/dL                                                                                                                                     | ___/___/___         | <input type="checkbox"/> |
| 39. Serum transferrin                                  | _ _ _ _  mg/dL                                                                                                                                     | ___/___/___         | <input type="checkbox"/> |
| 40. Ferritin                                           | _ _ _ _  ng/mL                                                                                                                                     | ___/___/___         | <input type="checkbox"/> |
| 41. 25-Hydroxy Vitamin D                               | _ _ _  ng/mL                                                                                                                                       | ___/___/___         | <input type="checkbox"/> |
| 42. Erythropoietin (EPO)                               | _ _ _  mU/ml                                                                                                                                       | ___/___/___         | <input type="checkbox"/> |
| 43. Urine albumin                                      | _ _ _ _ .  _ _  mg/g                                                                                                                               | ___/___/___         | <input type="checkbox"/> |
| 44. Urine albumin / creatinine                         | _ _ .  _ _ _ _  mcg/mg                                                                                                                             | ___/___/___         | <input type="checkbox"/> |
| 45. Urine protein (dipstick)                           | _  0/negative  _  trace<br> _  1+  _  2+  _  3+  _  4+  _  positive                                                                                | ___/___/___         | <input type="checkbox"/> |
| 46. Urine protein/creatinine                           | _ _ .  _ _ _ _  mg/g                                                                                                                               | ___/___/___         | <input type="checkbox"/> |
| 47. Urine dipstick heme                                | _  0/negative  _  trace<br> _  1+  _  2+  _  3+  _  4+  _  positive                                                                                | ___/___/___         | <input type="checkbox"/> |
| 48. Urine microscopic RBCs                             | _ _ _ _ .  _ _ _  10 <sup>3</sup> /mm <sup>3</sup> (if < 100, enter exact value) OR  _  ≥ 100 10 <sup>3</sup> /mm <sup>3</sup>                     | ___/___/___         | <input type="checkbox"/> |
| 49. Urine microscopic WBCs                             | _ _ _ _ .  _ _ _  10 <sup>3</sup> /mm <sup>3</sup> (if < 100, enter exact value) OR  _  ≥ 100 10 <sup>3</sup> /mm <sup>3</sup>                     | ___/___/___         | <input type="checkbox"/> |
| 50. Hemoglobin fractionation, baseline (before HU use) | Hb A  _ _ _ % Hb A2  _ _ _ %<br>Hb C  _ _ _ % Hb D  _ _ _ %<br>Hb E  _ _ _ % Hb F  _ _ _ %<br>Hb O  _ _ _ % Hb S  _ _ _ %<br>Other, _____  _ _ _ % | ___/___/___         | <input type="checkbox"/> |
| 51. Hemoglobin fractionation, most recent              | Hb A  _ _ _ % Hb A2  _ _ _ %<br>Hb C  _ _ _ % Hb D  _ _ _ %<br>Hb E  _ _ _ % Hb F  _ _ _ %<br>Hb O  _ _ _ % Hb S  _ _ _ %<br>Other, _____  _ _ _ % | ___/___/___         | <input type="checkbox"/> |
| 52. Hemoglobin fractionation, maximum dose HU          | Hb A  _ _ _ % Hb A2  _ _ _ %<br>Hb C  _ _ _ % Hb D  _ _ _ %<br>Hb E  _ _ _ % Hb F  _ _ _ %<br>Hb O  _ _ _ % Hb S  _ _ _ %<br>Other, _____  _ _ _ % | ___/___/___         | <input type="checkbox"/> |

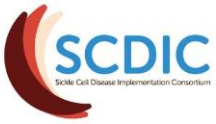

# Renal Form

Subject ID Label

DATE FORM COMPLETED: |\_|\_|-|\_|\_|-|\_|\_|\_|\_|

This form should be completed if YES to either Q35 (chronic kidney disease) or Q36 (end stage renal disease) on the enrollment Medical Record Abstraction Form.

|                                                         | <b>1. Albuminuria</b>                                                                                                                                                                                                                                                                                 | <b>2. Proteinuria</b>                                                                                                                                                                                                                                                                                 |
|---------------------------------------------------------|-------------------------------------------------------------------------------------------------------------------------------------------------------------------------------------------------------------------------------------------------------------------------------------------------------|-------------------------------------------------------------------------------------------------------------------------------------------------------------------------------------------------------------------------------------------------------------------------------------------------------|
| <b>a. When did it start?</b>                            | _ _ - _ _ - _ _ _ _ <br><b>OR</b><br><input type="checkbox"/> Less than 1 year ago<br><input type="checkbox"/> Between 1 and 2 years ago<br><input type="checkbox"/> More than 2 years ago<br><input type="checkbox"/> Unknown/NA<br><input type="checkbox"/> Has not had albuminuria <b>GO TO Q2</b> | _ _ - _ _ - _ _ _ _ <br><b>OR</b><br><input type="checkbox"/> Less than 1 year ago<br><input type="checkbox"/> Between 1 and 2 years ago<br><input type="checkbox"/> More than 2 years ago<br><input type="checkbox"/> Unknown/NA<br><input type="checkbox"/> Has not had proteinuria <b>GO TO Q3</b> |
| <b>b. Date of most recent measurement</b>               | _ _ - _ _ - _ _ _ _ <br><input type="checkbox"/> Unknown/NA<br><input type="checkbox"/> No measurement available <b>GO TO Q2</b>                                                                                                                                                                      | _ _ - _ _ - _ _ _ _ <br><input type="checkbox"/> Unknown/NA<br><input type="checkbox"/> No measurement available <b>GO TO Q3</b>                                                                                                                                                                      |
| <b>c. Type of measurement (check one)</b>               | <input type="checkbox"/> Spot<br><input type="checkbox"/> 24-hour urine <b>GO TO Q2</b><br><input type="checkbox"/> Unknown/NA <b>GO TO Q2</b>                                                                                                                                                        | <input type="checkbox"/> Spot<br><input type="checkbox"/> 24-hour urine <b>GO TO Q3</b><br><input type="checkbox"/> Unknown/NA <b>GO TO Q3</b>                                                                                                                                                        |
| <b>d. Spot urine sample</b>                             | _____ mg/L (milligram albumin per liter of urine)                                                                                                                                                                                                                                                     | _____ mg/L (milligram protein per liter of urine)                                                                                                                                                                                                                                                     |
| <b>e. Spot urine [albumin/protein]/creatinine ratio</b> | _____ mg/mmol (milligram albumin per millimole creatinine)<br>_____ µg/mg (microgram albumin per milligram creatinine)                                                                                                                                                                                | _____ mg/mmol (milligram protein per millimole creatinine)<br>_____ µg/mg (microgram protein per milligram creatinine)                                                                                                                                                                                |

|                                           | <b>3. eGFR &lt;60</b>                                                                                                                                                                                                                                                                                 |
|-------------------------------------------|-------------------------------------------------------------------------------------------------------------------------------------------------------------------------------------------------------------------------------------------------------------------------------------------------------|
| <b>a. When did it start?</b>              | _ _ - _ _ - _ _ _ _ <br><b>OR</b><br><input type="checkbox"/> Less than 1 year ago<br><input type="checkbox"/> Between 1 and 2 years ago<br><input type="checkbox"/> More than 2 years ago<br><input type="checkbox"/> Unknown/NA<br><input type="checkbox"/> Has not had albuminuria <b>GO TO Q4</b> |
| <b>b. Date of most recent measurement</b> | _ _ - _ _ - _ _ _ _ <br><input type="checkbox"/> Unknown/NA<br><input type="checkbox"/> No measurement available <b>GO TO Q4</b>                                                                                                                                                                      |



| 4. Has the subject had:                  | Yes                      | No                       | Unknown                  |
|------------------------------------------|--------------------------|--------------------------|--------------------------|
| a. History of acute kidney injury (AKI*) | <input type="checkbox"/> | <input type="checkbox"/> | <input type="checkbox"/> |
| b. History of >1 episode of AKI*         | <input type="checkbox"/> | <input type="checkbox"/> | <input type="checkbox"/> |
| c. Hemodialysis                          | <input type="checkbox"/> | <input type="checkbox"/> | <input type="checkbox"/> |
| d. Peritoneal dialysis                   | <input type="checkbox"/> | <input type="checkbox"/> | <input type="checkbox"/> |
| e. Kidney disease/ESRD                   | <input type="checkbox"/> | <input type="checkbox"/> | <input type="checkbox"/> |
| f. Kidney transplant                     | <input type="checkbox"/> | <input type="checkbox"/> | <input type="checkbox"/> |

Date:

|\_|\_|-|\_|\_|-|\_|\_|\_|\_|

**OR**

- Less than 1 year ago
- Between 1 and 2 years ago
- More than 2 years ago
- Unknown/NA

Date:

|\_|\_|-|\_|\_|-|\_|\_|\_|\_|

- Unknown/NA

Rejection?

- Yes
- No
- Unknown/NA

\*Must meet Acute Kidney Injury Network (AKIN) criteria, with a minimum of stage 1: an increase in serum creatinine of  $\geq 26.4 \mu\text{mol/L}$  or increase to  $\geq 150\text{--}200\%$  from baseline.

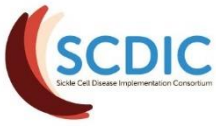

# Pulmonary hypertension and LV dysfunction Form

Subject ID Label

DATE FORM COMPLETED: |\_|\_|-|\_|\_|-|\_|\_|\_|\_|

Complete this form if there is a YES response to Q40. pulmonary hypertension OR Q41. LV dysfunction on the Enrollment Medical Record Abstraction Form. Use the most recent results available in the 5 years prior to the date of consent for the Registry.

Date of most recent ECHO: |\_|\_|-|\_|\_|-|\_|\_|\_|\_|  ECHO not available

| Measurement from ECHO |                                            | Qualitative data                                                                                                                                                     | Quantitative data                                                                                                                                                                                                                                           |
|-----------------------|--------------------------------------------|----------------------------------------------------------------------------------------------------------------------------------------------------------------------|-------------------------------------------------------------------------------------------------------------------------------------------------------------------------------------------------------------------------------------------------------------|
| 1.                    | Mitral regurgitation                       | <input type="checkbox"/> none<br><input type="checkbox"/> trivial <input type="checkbox"/> moderate<br><input type="checkbox"/> mild <input type="checkbox"/> severe |                                                                                                                                                                                                                                                             |
| 2.                    | Tricuspid regurgitation                    | <input type="checkbox"/> none<br><input type="checkbox"/> trivial <input type="checkbox"/> moderate<br><input type="checkbox"/> mild <input type="checkbox"/> severe |                                                                                                                                                                                                                                                             |
| 3.                    | TR jet velocity                            |                                                                                                                                                                      | ____ m/s                                                                                                                                                                                                                                                    |
| 4.                    | Tricuspid Annular Plane Systolic Excursion |                                                                                                                                                                      | _____ mm                                                                                                                                                                                                                                                    |
| 5.                    | Ejection fraction, left ventricle          |                                                                                                                                                                      | _ _ _ .  _  %                                                                                                                                                                                                                                               |
| 6.                    | Left Atrial Volume                         | <input type="checkbox"/> normal <input type="checkbox"/> moderate<br><input type="checkbox"/> mild <input type="checkbox"/> severe                                   | (LAESVI in ml/sq.m) = _____ ml/m <sup>2</sup>                                                                                                                                                                                                               |
| 7.                    | Right Atrial Volume                        | <input type="checkbox"/> normal <input type="checkbox"/> moderate<br><input type="checkbox"/> mild <input type="checkbox"/> severe                                   | (RAESVI in ml/sq.m) = _____ ml/m <sup>2</sup>                                                                                                                                                                                                               |
| 8.                    | Left ventricular volume                    | <input type="checkbox"/> normal <input type="checkbox"/> moderate<br><input type="checkbox"/> mild <input type="checkbox"/> severe                                   | Left ventricular end systolic dimension<br>LVIDs = _____ mm<br>LVESVI = _____ mL/m <sup>2</sup><br><br>Left ventricular end diastolic dimension<br>LVIDd = _____ mm<br><br>Left ventricular posterior wall mm thickness at end-diastole<br>LVPwD = _____ mm |
| 9.                    | Right ventricular volume                   | <input type="checkbox"/> normal <input type="checkbox"/> moderate<br><input type="checkbox"/> mild <input type="checkbox"/> severe                                   | Right ventricular end systolic dimension<br>RVIDs = _____ mm<br><br>Right ventricular end diastolic dimension<br>RVIDd = _____ mm<br><br>Mention of interventricular septal flattening Y/N                                                                  |
| 10.                   | RV hypertrophy                             | <input type="checkbox"/> normal <input type="checkbox"/> moderate<br><input type="checkbox"/> mild <input type="checkbox"/> severe                                   |                                                                                                                                                                                                                                                             |

Date of most recent EKG: |\_\_|\_\_|\_|-|\_\_|\_\_|\_|-|\_\_|\_\_|\_\_|\_\_|

EKG not available

| Measurement from EKG |                  | Diagnosed?                                                                                                   |
|----------------------|------------------|--------------------------------------------------------------------------------------------------------------|
| 11.                  | Arrhythmia       | <input type="checkbox"/> Yes → type _____<br><input type="checkbox"/> No<br><input type="checkbox"/> Unknown |
| 12.                  | Ventricular rate | _____ bpm <input type="checkbox"/> NA                                                                        |
| 13.                  | PR Interval      | _____ ms <input type="checkbox"/> NA                                                                         |
| 14.                  | QRS duration     | _____ ms <input type="checkbox"/> NA                                                                         |
| 15.                  | QT/QTc           | ____/____ ms <input type="checkbox"/> NA                                                                     |
| 16.                  | P-R-T axes       | ____ ____ ____ <input type="checkbox"/> NA                                                                   |

Date of most recent right heart catheterization: |\_\_|\_\_|\_|-|\_\_|\_\_|\_|-|\_\_|\_\_|\_\_|\_\_|

Report not available

| Target |                                                   | Measurement                                                  |
|--------|---------------------------------------------------|--------------------------------------------------------------|
| 17.    | RA pressure (mean)                                | _____ mm/hg <input type="checkbox"/> NA                      |
| 18.    | RV pressure (mean)                                | _____ mm/hg <input type="checkbox"/> NA                      |
| 19.    | PA pressure (mean)                                | _____ mm/hg <input type="checkbox"/> NA                      |
| 20.    | Pulmonary artery saturation                       | _____ % <input type="checkbox"/> NA                          |
| 21.    | Pulmonary vascular resistance                     | _____ dynes-sec-cm <sup>-5</sup> <input type="checkbox"/> NA |
| 22.    | Pulmonary capillary wedge pressure (PCWP or PAWP) | _____ mm/hg <input type="checkbox"/> NA                      |
| 23.    | Cardiac output and index                          | _____ L/min <input type="checkbox"/> NA                      |

**Notes:**

- 1) Right atrial pressure:** This is usually present in the echo report and is reported based on IVC collapsibility (might be under heading of IVC/Hepatic veins)
- 2) Right atrial size:** qualitatively (as normal, mildly, moderately or severely dilated) vs. quantitatively (RA area or RAESVI). The numerical values are all usually reported at the bottom of the report.
- 3) Left ventricular size** (qualitative - normal, mild, mod, severely dilated) vs quantitative (LVEDVI , LVESVI)
- 4) Any comment of interventricular septal flattening** indicates RV pressure or volume overloading and points to significant pulmonary hypertension.
- 5) Left atrial dimensions** reported qualitatively (as normal, mildly, moderately or severely dilated) vs. quantitatively (LAESVI in ml/sq.m). The numerical values are all usually reported at the bottom of the report.



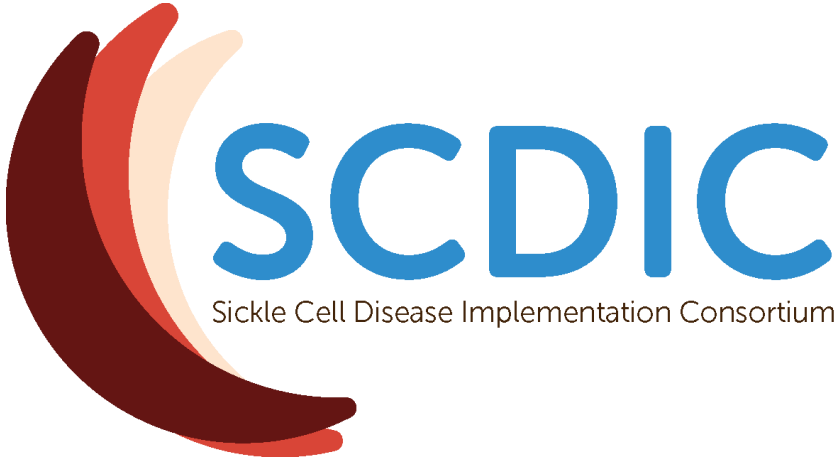

# **Patient Follow-up Survey**

Final Version 1.0, 2/18/2019



5. How severe was your pain during your last pain attack (crisis)? **Circle a number from 0 to 10 below**, where 0 is no pain and 10 is the worst pain imaginable.

|         |   |   |   |   |   |   |   |   |   |   |    |                       |
|---------|---|---|---|---|---|---|---|---|---|---|----|-----------------------|
| No Pain | 0 | 1 | 2 | 3 | 4 | 5 | 6 | 7 | 8 | 9 | 10 | Worst Pain Imaginable |
|---------|---|---|---|---|---|---|---|---|---|---|----|-----------------------|

6. How much did your last pain attack (crisis) interfere with your life?

- Not at all, I did everything I usually do
- I had to cut down on some things I usually do
- I could not do most things I usually do
- I could not take care of myself and needed some help from family or friends
- I could not take care of myself and needed constant care from family, friends, doctors, or nurses

7. About how long did your most recent pain attack (crisis) last?

- Less than 1 hour
- 1-12 hours
- 13-23 hours
- 1-3 days
- 4-6 days
- 1-2 weeks
- More than 2 weeks

8. Think about your pain in the **past 7 days**, and answer the following questions.

|    |                                                                                    | Never                    | Rarely                   | Sometimes                | Often                    | Always                   |
|----|------------------------------------------------------------------------------------|--------------------------|--------------------------|--------------------------|--------------------------|--------------------------|
| a. | How often did you have very severe pain?                                           | <input type="checkbox"/> | <input type="checkbox"/> | <input type="checkbox"/> | <input type="checkbox"/> | <input type="checkbox"/> |
| b. | How often did you have pain so bad that it was hard to finish what you were doing? | <input type="checkbox"/> | <input type="checkbox"/> | <input type="checkbox"/> | <input type="checkbox"/> | <input type="checkbox"/> |

9. Now think about your pain in the **past 6 months**, and answer the following questions.

|    |                                                                                    | Never                    | Rarely                   | Sometimes                | Often                    | Always                   |
|----|------------------------------------------------------------------------------------|--------------------------|--------------------------|--------------------------|--------------------------|--------------------------|
| a. | How often did you have very severe pain?                                           | <input type="checkbox"/> | <input type="checkbox"/> | <input type="checkbox"/> | <input type="checkbox"/> | <input type="checkbox"/> |
| b. | How often did you have pain so bad that it was hard to finish what you were doing? | <input type="checkbox"/> | <input type="checkbox"/> | <input type="checkbox"/> | <input type="checkbox"/> | <input type="checkbox"/> |

10. Think about how your pain felt in the **past 7 days**, and answer the following questions.

|    |                                           | Not at all               | A little bit             | Somewhat                 | Quite a bit              | Very much                |
|----|-------------------------------------------|--------------------------|--------------------------|--------------------------|--------------------------|--------------------------|
| a. | Did your pain feel like pins and needles? | <input type="checkbox"/> | <input type="checkbox"/> | <input type="checkbox"/> | <input type="checkbox"/> | <input type="checkbox"/> |
| b. | Did your pain feel sore?                  | <input type="checkbox"/> | <input type="checkbox"/> | <input type="checkbox"/> | <input type="checkbox"/> | <input type="checkbox"/> |

11. Would you say that your pain management plan is.....

- Effective for managing your pain
- Somewhat effective for managing your pain
- Ineffective at managing your pain
- You don't have a pain management plan

**B. YOUR MEDICAL CONDITIONS**

12. Do you get regular blood transfusions for your sickle cell disease?

- Yes
- No

13. In the past 12 months, how many units (pints) of blood have you received?

- None
- 1 – 2
- 3 – 5
- 6 – 10
- 11 – 15
- >15
- Don't Know

14. Are you **currently** on iron chelation treatment (e.g., Desferal, Exjade, Jadenu, deferasirox, Ferriprox, deferiprone, phlebotomy)?

- Yes
- No
- Don't Know

15. In the past 12 months, has your spleen been removed?

- Yes
- No

16. In the past 12 months, have you been **newly diagnosed** with any of the following conditions?

|    | Condition                                                              | YES                      | NO                       |
|----|------------------------------------------------------------------------|--------------------------|--------------------------|
| a. | Lung problems such as pneumonia or acute chest syndrome                | <input type="checkbox"/> | <input type="checkbox"/> |
| b. | Kidney damage                                                          | <input type="checkbox"/> | <input type="checkbox"/> |
| c. | Eye damage called retinopathy                                          | <input type="checkbox"/> | <input type="checkbox"/> |
| d. | Damage to your hip or shoulder due to sickle cell disease              | <input type="checkbox"/> | <input type="checkbox"/> |
| e. | High blood pressure in your lungs (also called pulmonary hypertension) | <input type="checkbox"/> | <input type="checkbox"/> |
| f. | Heart failure                                                          | <input type="checkbox"/> | <input type="checkbox"/> |
| g. | Blood clots in your legs or arms or that went to your lung             | <input type="checkbox"/> | <input type="checkbox"/> |
| h. | A stroke                                                               | <input type="checkbox"/> | <input type="checkbox"/> |
| i. | Asthma                                                                 | <input type="checkbox"/> | <input type="checkbox"/> |
| j. | Diabetes                                                               | <input type="checkbox"/> | <input type="checkbox"/> |
| k. | Liver problems such as hepatitis, iron overload, or cirrhosis          | <input type="checkbox"/> | <input type="checkbox"/> |
| l. | Skin ulcers                                                            | <input type="checkbox"/> | <input type="checkbox"/> |

### C. HYDROXYUREA USE

17. In the past 12 months, have you taken hydroxyurea?

- Yes
- No → **skip to Section D**

18. Are you **currently** taking hydroxyurea?

- Yes → **skip to Question 20**
- No

19. In the past 12 months, what is the reason you discontinued or stopped taking hydroxyurea? Please select one from the list below.

- Side effects
- Personal preference
- Provider decision
- Didn't work
- Pregnancy concerns
- Other reason not listed above, specify \_\_\_\_\_



20. How many days did you take hydroxyurea in the PAST WEEK?

- 0 days    1 day    2 days    3 days    4 days    5 days    6 days    7 days

21. In the last 12 months, which of the following side effects did you experience while you were taking hydroxyurea? Select one or more from the list below.

- Hair loss/thinning  
 Nail blackening or discoloration  
 Lowered blood counts (e.g., platelets, white count, hemoglobin)  
 Low sperm count or other fertility problems  
 Nausea/vomiting  
 Skin ulcers  
 Weight gain  
 Headaches or dizziness  
 Fatigue/drowsiness  
 No side effects

22. In the last 12 months, what makes it difficult for you to take hydroxyurea, or is there a reason why you do not take hydroxyurea? Select one or more from the list below, whether or not you have ever taken hydroxyurea.

- I have no difficulties or concerns using hydroxyurea  
 I don't know enough about the medicine  
 Sometimes I forget to take the medicine  
 I am worried about side effects  
 I don't like the frequent blood tests or clinic visits  
 I'm feeling well and I don't think I need it  
 The cost is more than I can afford  
 I have heard that hydroxyurea may cause cancer  
 I have heard that hydroxyurea may cause problems with having healthy children  
 Other difficulty, specify \_\_\_\_\_

#### D. OTHER MEDICATIONS YOU ARE TAKING

23. In the past 12 months, have you taken the drug called Endari (l-glutamine)?

- Yes  
 No → **skip to Question 28**

24. Are you **currently** taking Endari?

- Yes → **skip to Question 26**  
 No

25. In the past 12 months, what is the reason you discontinued or stopped taking Endari? Please select one from the list below.

- Side effects  
 Personal preference  
 Provider decision  
 Didn't work  
 Other reason not listed above, specify \_\_\_\_\_

26. How many days did you take Endari in the PAST WEEK?

- 0 days    1 day    2 days    3 days    4 days    5 days    6 days    7 days

27. In the last 12 months, what side effects have you experienced while you were taking Endari? Select one or more from the list below.

- No side effects
- Nausea/vomiting
- Stomach pain
- Cough
- Headaches or dizziness
- Other not listed above \_\_\_\_\_

28. We would like to know what other types of medications you are **currently** taking, **excluding pain medications, iron chelators, hydroxyurea, and Endari** which we already asked about.

Review the list in the table below and check the box next to the type of medications you are **currently** taking.

| CATEGORIES OR TYPES OF DRUGS YOU MAY BE TAKING                     |                                                             |
|--------------------------------------------------------------------|-------------------------------------------------------------|
| <input type="checkbox"/> Allergy drugs                             | <input type="checkbox"/> High cholesterol drugs             |
| <input type="checkbox"/> Asthma or COPD inhalers (bronchodilators) | <input type="checkbox"/> Hypothyroid drugs                  |
| <input type="checkbox"/> Antibiotics                               | <input type="checkbox"/> Insomnia drugs & sleep aides       |
| <input type="checkbox"/> ADD/ADHD drugs                            | <input type="checkbox"/> Nausea drugs                       |
| <input type="checkbox"/> Anti-seizure drugs                        | <input type="checkbox"/> Muscle relaxers                    |
| <input type="checkbox"/> Anti-anxiety drugs                        | <input type="checkbox"/> Stool softeners and laxatives      |
| <input type="checkbox"/> Antidepressants                           | <b>TYPES OF VITAMINS</b>                                    |
| <input type="checkbox"/> Birth control                             | <input type="checkbox"/> Iron supplements                   |
| <input type="checkbox"/> Blood thinning drugs (anticoagulants)     | <input type="checkbox"/> Folic acid                         |
| <input type="checkbox"/> Diabetes drugs                            | <input type="checkbox"/> Vitamin D, all types               |
| <input type="checkbox"/> Diuretics, fluid/water retention pills    | <input type="checkbox"/> Multi-vitamins                     |
| <input type="checkbox"/> Heartburn, indigestion, acid reflux drugs | <input type="checkbox"/> Any other vitamins and supplements |

29. Are you taking any medications for **high blood pressure** (hypertension) or for your **heart**?  Yes  No

If yes, what is the name of the high blood pressure or heart medication? \_\_\_\_\_

30. Are you taking any other type of medication that we did not already ask about?  Yes  No

If yes, what is the name of the other medication(s)? \_\_\_\_\_

31. Are you currently participating in a study where you are taking a medicine for sickle cell?  Yes  No

## E. YOUR SLEEP

32. Think about your sleep in the **past 7 days**, and answer the following questions.

|    |                                                                                | Never                    | Rarely                   | Sometimes                | Often                    | Always                   |
|----|--------------------------------------------------------------------------------|--------------------------|--------------------------|--------------------------|--------------------------|--------------------------|
| a. | How often did you stay up most of the night because you could not fall asleep? | <input type="checkbox"/> | <input type="checkbox"/> | <input type="checkbox"/> | <input type="checkbox"/> | <input type="checkbox"/> |
| b. | How often did you have a lot of trouble falling asleep?                        | <input type="checkbox"/> | <input type="checkbox"/> | <input type="checkbox"/> | <input type="checkbox"/> | <input type="checkbox"/> |

**F. YOUR SOCIAL AND MENTAL HEALTH**

33. Think about how you felt in the **past 7 days**, and respond to each question or statement.

|    |                                                                      | Never                    | Rarely                   | Sometimes                | Often                    | Always                   |
|----|----------------------------------------------------------------------|--------------------------|--------------------------|--------------------------|--------------------------|--------------------------|
| a. | I felt worthless.                                                    | <input type="checkbox"/> | <input type="checkbox"/> | <input type="checkbox"/> | <input type="checkbox"/> | <input type="checkbox"/> |
| b. | I felt helpless.                                                     | <input type="checkbox"/> | <input type="checkbox"/> | <input type="checkbox"/> | <input type="checkbox"/> | <input type="checkbox"/> |
| c. | I felt depressed.                                                    | <input type="checkbox"/> | <input type="checkbox"/> | <input type="checkbox"/> | <input type="checkbox"/> | <input type="checkbox"/> |
| d. | I felt hopeless.                                                     | <input type="checkbox"/> | <input type="checkbox"/> | <input type="checkbox"/> | <input type="checkbox"/> | <input type="checkbox"/> |
| e. | How often did you feel completely hopeless because of your health?   | <input type="checkbox"/> | <input type="checkbox"/> | <input type="checkbox"/> | <input type="checkbox"/> | <input type="checkbox"/> |
| f. | How often were you very worried about needing to go to the hospital? | <input type="checkbox"/> | <input type="checkbox"/> | <input type="checkbox"/> | <input type="checkbox"/> | <input type="checkbox"/> |
|    |                                                                      | Not at all               | A little bit             | Somewhat                 | Quite a bit              | Very much                |
| g. | I felt tired.                                                        | <input type="checkbox"/> | <input type="checkbox"/> | <input type="checkbox"/> | <input type="checkbox"/> | <input type="checkbox"/> |

34. In the **past 7 days**, how often did the following happen?

|    |                                                                       | Never                    | Rarely (Once)            | Sometimes (2-3 times)    | Often (once a day)       | Very often (several times a day) |
|----|-----------------------------------------------------------------------|--------------------------|--------------------------|--------------------------|--------------------------|----------------------------------|
| a. | I had to read something several times to understand it.               | <input type="checkbox"/> | <input type="checkbox"/> | <input type="checkbox"/> | <input type="checkbox"/> | <input type="checkbox"/>         |
| b. | My thinking was slow.                                                 | <input type="checkbox"/> | <input type="checkbox"/> | <input type="checkbox"/> | <input type="checkbox"/> | <input type="checkbox"/>         |
| c. | I had to work really hard to pay attention or I would make a mistake. | <input type="checkbox"/> | <input type="checkbox"/> | <input type="checkbox"/> | <input type="checkbox"/> | <input type="checkbox"/>         |
| d. | I had trouble concentrating.                                          | <input type="checkbox"/> | <input type="checkbox"/> | <input type="checkbox"/> | <input type="checkbox"/> | <input type="checkbox"/>         |

35. How much DIFFICULTY do you **currently** have doing the following things?

|    |                                                                                                                                                             | None                     | A little                 | Somewhat                 | A lot                    | Cannot do                |
|----|-------------------------------------------------------------------------------------------------------------------------------------------------------------|--------------------------|--------------------------|--------------------------|--------------------------|--------------------------|
| a. | Reading and following complex instructions (e.g., directions for a new medication)?                                                                         | <input type="checkbox"/> | <input type="checkbox"/> | <input type="checkbox"/> | <input type="checkbox"/> | <input type="checkbox"/> |
| b. | Planning for and keeping appointments that are not part of your weekly routine (e.g., therapy or doctor appointment, social gathering with friends/family)? | <input type="checkbox"/> | <input type="checkbox"/> | <input type="checkbox"/> | <input type="checkbox"/> | <input type="checkbox"/> |
| c. | Managing your time to do most of your daily activities?                                                                                                     | <input type="checkbox"/> | <input type="checkbox"/> | <input type="checkbox"/> | <input type="checkbox"/> | <input type="checkbox"/> |
| d. | Learning new tasks or instructions?                                                                                                                         | <input type="checkbox"/> | <input type="checkbox"/> | <input type="checkbox"/> | <input type="checkbox"/> | <input type="checkbox"/> |

36. In the **past 30 days**, how much did the following happen?

|    |                                                                               | Not at all               | A little bit             | Somewhat                 | Quite a bit              | Very much                |
|----|-------------------------------------------------------------------------------|--------------------------|--------------------------|--------------------------|--------------------------|--------------------------|
| a. | How much did you rely on others to take care of you because of your health?   | <input type="checkbox"/> | <input type="checkbox"/> | <input type="checkbox"/> | <input type="checkbox"/> | <input type="checkbox"/> |
| b. | How much did your health make it hard for you to do things with your friends? | <input type="checkbox"/> | <input type="checkbox"/> | <input type="checkbox"/> | <input type="checkbox"/> | <input type="checkbox"/> |

## G. YOUR ABILITY TO MANAGE YOUR SICKLE CELL DISEASE

37. How often do you need to have someone help you when you read instructions, pamphlets, or other written material from your doctor or pharmacy?

- Never
- Rarely
- Sometimes
- Often
- Always

38. Please respond to each statement below by marking one box per row.

| CURRENT Level of Confidence (confidence is how sure you are about each statement) |                                                                                             | I am not at all confident | I am a little confident  | I am somewhat confident  | I am quite confident     | I am very confident      |
|-----------------------------------------------------------------------------------|---------------------------------------------------------------------------------------------|---------------------------|--------------------------|--------------------------|--------------------------|--------------------------|
| a.                                                                                | I can follow directions when my doctor changes my medications.                              | <input type="checkbox"/>  | <input type="checkbox"/> | <input type="checkbox"/> | <input type="checkbox"/> | <input type="checkbox"/> |
| b.                                                                                | I can take my medication when there is a change in my usual day (unexpected things happen). | <input type="checkbox"/>  | <input type="checkbox"/> | <input type="checkbox"/> | <input type="checkbox"/> | <input type="checkbox"/> |
| c.                                                                                | I can manage my medication without help.                                                    | <input type="checkbox"/>  | <input type="checkbox"/> | <input type="checkbox"/> | <input type="checkbox"/> | <input type="checkbox"/> |
| d.                                                                                | I can list my medications, including the doses and schedule.                                | <input type="checkbox"/>  | <input type="checkbox"/> | <input type="checkbox"/> | <input type="checkbox"/> | <input type="checkbox"/> |

## H. BARRIERS TO YOUR MEDICAL CARE

39. During the past 12 months, was there any time when you didn't get the medical care you needed or had delays in getting the care you needed?

- Yes
- No → *skip to END*

40. In the past 12 months, did you not get the medical care you needed or have delays getting medical care you needed for any of the following reasons? Select one or more from the list below.

- Worry about the cost
- The doctor or hospital wouldn't accept your health insurance
- Your health plan wouldn't pay for the treatment
- You couldn't get an appointment soon enough
- You couldn't get there when the doctor's office or clinic was open
- It takes too long to get to the doctor's office or clinic from your house or work
- You couldn't get through on the telephone
- You were too busy with work or other commitments to take the time
- You didn't think the problem was serious enough
- You had previous bad experiences with the health care system
- People at the doctor's office or clinic don't speak the same language I do
- Some other reason not listed above, please specify \_\_\_\_\_

***This is the END of the survey. Please return it to the study coordinator. Thank you!***

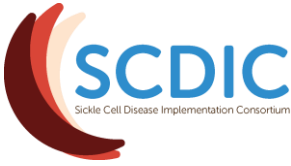

# Adverse Childhood Experience Questionnaire (ACE-Q) Version 1.0 (2/18/2019)

Subject ID

Today's date: |\_\_|\_\_|/|\_\_|\_\_|/|\_2\_|\_0\_|\_\_|\_\_|  
Month Day Year

This form asks questions about events that happened during your childhood. Please read the statements below. Count the number of statements that apply to you and write the total number in the box provided. **Please DO NOT mark or indicate which specific statements apply to you.**

1) Of the statements in Section 1, HOW MANY apply to you? Write the total number in the box:

**Section 1. At any point before you were age 18:**

- Your parents or guardians were separated or divorced
- You lived with a household member who served time in jail or prison
- You lived with a household member who was depressed, mentally ill or attempted suicide
- You saw or heard household members hurt or threaten to hurt each other
- A household member swore at, insulted, humiliated, or put you down in a way that scared you OR a household member acted in a way that made you afraid that you might be physically hurt
- Someone touched your private parts or asked you to touch their private parts in a sexual way that was unwanted, against your will, or made you feel uncomfortable
- More than once, you went without food, clothing, a place to live or had no one to protect you
- Someone pushed, grabbed, slapped or threw something at you OR you were hit so hard that you were injured or had marks
- You lived with someone who had a problem with drinking or using drugs
- You felt unsupported, unloved and/or unprotected

2) Of the statements in Section 2, HOW MANY apply to you? Write the total number in the box:

**Section 2. At any point before you were age 18:**

- You were in foster care
- You experienced harassment or bullying at school
- You lived with a parent or guardian who died
- You were separated from your primary caregiver through deportation or immigration
- You had a serious medical procedure or life threatening illness
- You often saw or heard violence in the neighborhood or in your school neighborhood
- You were detained, arrested or incarcerated
- You were often treated badly because of race, sexual orientation, place of birth, disability or religion
- You experienced verbal or physical abuse or threats from a romantic partner (i.e., boyfriend or girlfriend)

***This is the END of the survey. Please return it to the study coordinator.  
Thank you for your participation.***
